# Supplementary material for: Screening of Ester-Forming and Hydrolyzing Enzymes Linked to Pheromone Production in Ips typographus (Linnaeus, 1758)
Source: Research Square preprint supplement (doi:10.21203/rs.3.rs-7583299/v1), 2025-10-03
Supplement: Supplementary file 1 [file 0cec27f5a47ca516537a18f9.xlsx]

## Sheet: List1
			Female Fed Fatbody (FFFb)	Female Fed Fatbody (FFFb)	Female Immature Fatbody (FIFb)	Female Immature Fatbody (FIFb)	Female Immature Fatbody (FIFb)	Female Immature Midgut (FIMg)	Female JHIII Midgut (FJMg)	Male Fed Fatbody (MFFb)	Male Fed Fatbody (MFFb)	Male Fed Fatbody (MFFb)	Male Fed Fatbody (MFFb)	Male Immature Fatbody (MIFb)	Male Immature Fatbody (MIFb)	Male Immature Fatbody (MIFb)	Male Fed Midgut (MFMg)	Male Fed Midgut (MFMg)	Male Immature Midgut (MIMg)	Male JHIII Midgut (MJMg)	Male JHIII Midgut (MJMg)
			Female Immature Fatbody (FIFb)	Larvae L1 Whole body (L1Wb)	Female Acetone Midgut (FAMg)	Female Immature Midgut (FIMg)	Larvae L1 Whole body (L1Wb)	Female Acetone Midgut (FAMg)	Female Acetone Midgut (FAMg)	Female Fed Fatbody (FFFb)	Larvae L1 Whole body (L1Wb)	Male Immature Fatbody (MIFb)	Male Fed Midgut (MFMg)	Larvae L1 Whole body (L1Wb)	Male Acetone Midgut (MAMg)	Male Immature Midgut (MIMg)	Female Acetone Midgut (FAMg)	Male Acetone Midgut (MAMg)	Female Acetone Midgut (FAMg)	Female Acetone Midgut (FAMg)	Male Acetone Midgut (MAMg)
	Ityp-CE1-2	Log2FC	-0.693446	-1.47867	2.84856	0.972057	-0.684693	1.87299	-0.142556	-1.17009	-2.84604	-2.56589	0.353956	-0.0717537	3.87881	2.12431	0.574733	0.943107	1.41823	-0.0807458	0.36718
		padj	0.255812	0.00300286	1.11889e-09	0.328633	0.283718	1	0.998843	0.191511	1.60433e-07	0.00294195	0.668599	0.948966	1.39355e-07	0.0311811	0.390967	0.155515	0.0441054	0.913859	0.861346
	Ityp-CE3	Log2FC	-1.46098	-0.613814	3.24805	1.15758	0.933287	2.07088	-0.947702	0.143415	-0.674221	-2.18616	1.29292	1.73084	4.31314	1.52387	0.57748	0.810557	2.58354	0.418044	0.725593
		padj	0.0443996	0.207405	1.5838e-08	0.0720434	0.129657	2.74392e-09	0.246533	0.966801	0.0623057	0.00932592	0.029817	0.0203088	1.8066e-08	0.0970824	0.386507	0.254996	3.70937e-08	0.402354	0.425791
	Ityp-CE4	Log2FC	-0.504206	0.707675	1.59894	3.2376	1.32093	-1.63013	-0.805311	-0.301708	0.210375	-1.39763	0.132411	1.84156	2.59433	3.25581	0.602321	1.02225	-1.05274	-0.00220904	0.495123		Positive log2FC
		padj	0.263304	0.0258028	1.53731e-05	0.000147002	0.000154052	0.0937249	0.378294	0.834153	0.615521	0.0312738	0.865736	0.000580689	2.88024e-06	0.000451203	0.335102	0.0892569	0.210486	0.996555	0.384835			P < 0,001
	Ityp-CE5	Log2FC	-1.14393	-0.635201	2.36791	2.18991	0.604165	0.168682	-0.475669	-0.244363	-1.08052	-1.67165	0.0679792	0.81909	2.63936	2.40235	0.850597	0.867752	0.247586	0.337712	0.430554			P < 0,01
		padj	0.0369961	0.0695119	2.87644e-07	0.000478838	0.221227	0.81807	0.828309	0.893886	0.000481555	0.0168674	0.932411	0.206873	2.75095e-05	0.00177845	0.129054	0.158769	0.713899	0.427031	0.642853			P < 0,05
	Ityp-CE6	Log2FC	-1.65601	-0.564957	3.47649	1.5829	1.19383	1.88294	-0.46895	-0.269136	-1.03104	-2.49207	0.582341	1.68822	3.61426	2.10033	0.90888	0.50676	1.9431	0.435674	0.111229
		padj	0.000249622	0.161951	8.08559e-18	0.0015959	0.00509428	3.08382e-05	0.839753	0.873709	0.00225102	0.000321135	0.328935	0.00874023	4.8074e-08	0.00632311	0.0926131	0.47527	2.45073e-05	0.27122	0.984104		Negative log2FC
	Ityp-CE7	Log2FC	-0.512809	-0.0641137	2.88326	1.4946	0.551555	1.38132	-0.352945	-0.334088	-0.591733	-1.51854	1.4084	1.14601	3.68802	2.08098	0.569431	0.731475	1.4706	0.367707	0.606142			P < 0,001
		padj	0.409166	0.908067	4.03766e-12	0.0100194	0.219225	0.0113315	0.998843	0.849127	0.0584017	0.0656114	0.0288497	0.113957	1.15337e-07	0.0122088	0.435388	0.338982	0.00222773	0.396938	0.360272			P < 0,01
	Ityp-CE8	Log2FC	-1.74191	-0.810946	3.391	1.90055	1.02572	1.47755	-0.468582	-0.300053	-1.30156	-2.49894	0.142537	1.41813	3.71628	2.09885	1.15723	1.04287	1.7518	0.289163	0.252349			P < 0,05
		padj	0.000516023	0.0181086	1.12261e-13	0.00361422	0.04134	0.0129574	0.947048	0.839316	0.000208198	0.000717712	0.792067	0.0421381	1.77285e-08	0.00927796	0.00143551	0.00608848	0.000139737	0.499999	0.866112
	Ityp-CE9	Log2FC	-0.981668	-1.55264	3.71416	1.87096	-0.473959	1.84712	0.13822	-0.193979	-1.93698	-1.75498	0.944471	0.0354321	5.29357	1.81002	1.53879	2.56566	2.48922	0.646268	1.74577
		padj	0.128889	3.24254e-05	3.56069e-14	0.112464	0.406216	0.136003	0.998843	0.949254	2.09029e-06	0.0413738	0.240753	0.970113	1.36672e-15	0.0959841	0.0212506	8.87666e-05	0.00123493	0.140373	5.57594e-06
	Ityp-CE10	Log2FC	-1.44852	-0.905346	5.44788	2.63683	0.638916	2.79865	0.91568	-0.0198453	-1.11852	-2.76037	2.1605	1.85067	7.62925	3.34952	1.75685	2.68907	3.38585	0.695085	1.69263
		padj	0.0121459	0.00734336	5.16376e-23	0.000107051	0.256712	3.48403e-05	0.998843	0.996231	0.0166505	0.00402923	0.0261574	0.0262779	2.09857e-22	0.000639522	0.200284	0.0374174	6.99042e-08	0.232511	3.43161e-05
	Ityp-CE11	Log2FC	-0.559167	-3.25548	1.48785	-0.0733021	-2.60261	1.54291	-0.295555	-0.0692908	-3.51837	-0.17625	-0.109815	-3.11798	0.826419	-1.03385	0.91183	0.727259	2.07264	0.14881	0.0413349
		padj	0.42949	2.03682e-15	0.0101598	0.927928	1.32533e-06	0.00916029	0.998843	0.978127	3.98666e-16	0.846809	0.876144	6.8691e-08	0.182907	0.173158	0.0762516	0.177882	7.76548e-05	0.827401	0.990818
	Ityp-CE12	Log2FC	-1.09076	0.186019	1.7244	0.408117	1.38279	1.3099	-0.210487	-0.116198	-0.129466	-1.3004	1.8648	1.40409	2.08354	0.458652	-1.38883	-1.11351	1.36849	0.032904	0.390442
		padj	0.00189494	0.780303	6.16955e-09	0.281296	0.0019854	8.38604e-05	0.998843	0.96714	0.850628	0.0192521	2.05673e-10	0.0182127	4.93845e-05	0.488658	6.00363e-09	0.00134268	0.000610098	0.945394	0.704116
	Ityp-CE13	Log2FC	-2.65681	-1.00446	2.67635	0.258175	1.76733	2.41253	0.499532	0.502065	-0.656738	-2.06484	5.67122	1.65953	1.16764	0.665389	-5.14292	-6.6026	1.98191	1.56398	0.193224
		padj	0.00496217	0.3196	1.15876e-09	0.57208	1.65851e-07	1.22078e-06	0.998843	0.930201	0.186303	0.00115094	1.44349e-46	0.000893891	0.126311	0.357223	4.22056e-39	9.37834e-52	0.000426255	9.4213e-05	0.975806
	Ityp-CE14	Log2FC	-0.986374	-12.0244	-0.972011	-0.248335	-10.8725	-0.71993	-2.61585	1.77948	-10.4212	-1.53817	0.798272	-8.69125	2.72726	1.44584	-1.00997	0.354385	-0.093104	-1.04108	0.399973
		padj	0.684619	3.26159e-21	0.577737	0.918808	8.38202e-75	0.82654	0.559307	0.827217	8.10657e-41	0.421088	0.617778	5.26348e-19	1	1	0.549592	0.907956	1	0.574796	0.986439
	Ityp-CE15	Log2FC	4.56693	7.63889	-1.17994	-3.24949	3.14746	2.08725	-0.873973	-0.0504338	7.39235	3.1913	4.58319	4.50718	0.0676917	-1.94883	-1.25355	-1.3877	2.14456	0.113687	0.0688312
		padj	3.60716e-16	1.72335e-08	0.232539	1	0.00424099	1	0.998843	0.993192	5.96002e-14	0.000644311	4.92355e-21	0.00133298	0.97322	0.0532615	0.126761	0.334266	0.0244582	0.969583	0.99624
	Ityp-CE16	Log2FC	-1.10517	-8.90411	-7.51871	-10.5158	-7.67645	2.99953	-0.0337679	-1.4362	-10.5411	-3.53749	-8.76629	-6.76563	-7.91381	-8.89866	-1.32033	-2.69314	2.37655	0.904561	-0.390995
		padj	0.243451	1.44932e-62	6.08744e-43	5.04113e-56	3.50408e-40	2.27726e-10	0.998843	0.679431	9.31227e-44	0.00351382	5.70402e-32	2.7181e-25	3.71497e-32	4.74291e-37	0.000143243	7.43693e-12	6.30972e-08	0.00164667	0.774843
	Ityp-CE17	Log2FC	-0.35774	1.50026	-0.29507	4.02115	1.97039	-4.30498	-0.843596	0.646563	1.94435	0.338488	-0.690525	1.87434	-1.32083	4.17891	0.651424	-0.325085	-4.4729	0.731478	-0.155028
		padj	0.669284	0.0540064	0.751448	0.00516278	0.0100207	0.00763821	0.834796	0.831846	0.029652	0.808235	0.314234	0.0852325	0.195078	0.00407173	0.240516	0.687834	3.59731e-05	0.273701	0.984104
	Ityp-CE18	Log2FC	0.0413148	-2.84807	1.86772	4.23029	-2.7861	-2.36369	-1.02958	-0.734416	-3.7588	0.959992	-0.522877	-4.39594	1.53798	2.45466	1.67374	3.04448	-2.26292	0.6598	2.072
		padj	0.977307	0.000359672	0.0852998	0.00103228	1.23647e-05	1	1	0.929285	0.000209557	0.744024	0.813709	4.63816e-05	0.641448	1	0.348381	0.135153	1	0.83703	0.824972
	Ityp-CE19	Log2FC	-0.168141	0.0114885	2.08347	-1.13732	0.28421	3.19782	0.745037	0.385355	0.238547	-0.769651	0.28351	1.24045	1.92612	1.41151	2.01009	0.84377	1.70621	1.49426	0.409442
		padj	0.885432	0.992745	0.000492174	0.323762	0.617383	0.00833623	0.998843	0.930201	0.710908	0.246886	0.605238	0.0172154	0.00188284	0.322827	0.000150319	0.17422	0.231718	0.0220683	0.895162
	Ityp-CE20	Log2FC	2.03894	5.86155	-3.01102	2.087	3.92113	-5.10895	-1.06826	0.1167	5.77665	3.76888	1.39437	2.24662	0.312793	0.282377	-2.29421	2.68284	-4.91548	-5.46731	-0.410579
		padj	5.8461e-06	4.40826e-17	8.18668e-25	1.89745e-05	4.37727e-09	4.09601e-26	0.998843	0.981453	8.45867e-12	1.2026e-05	0.0537805	0.0203919	0.713229	0.724525	1.12004e-09	2.3803e-10	7.33928e-45	3.51872e-83	0.796751
	Ityp-CE21	Log2FC	0.026532	0.0654767	1.23937	-3.08678	0.113383	4.29952	0.0012333	0.827765	0.710234	0.613105	2.55414	0.299488	0.93521	-2.46808	-0.494098	-1.02288	3.94403	0.0370568	-0.411076
		padj	0.985234	0.943666	0.163679	0.000431409	0.9182	3.54495e-14	0.999514	0.39908	0.276553	0.614516	5.51157e-19	0.803882	1	0.00907392	0.159791	0.00215256	2.74369e-22	0.951056	0.669875
	Ityp-CE22	Log2FC	-2.59087	-1.36606	0.310045	-1.39904	1.32672	1.68665	-1.10659	0.251017	-1.29821	-2.7094	-1.45407	1.64347	-0.134119	-0.733588	-0.598896	-1.41186	1.42842	-0.65371	-1.38636
		padj	7.80719e-09	0.00566117	0.529904	7.68753e-06	0.00290981	2.58047e-18	0.171101	0.933408	0.0051641	1.46036e-06	3.42963e-05	0.00404764	0.865008	0.174612	0.0395899	6.97399e-06	1.46443e-11	0.00200184	5.46186e-07
	Ityp-CE23	Log2FC	-0.807245	-1.28024	1.39457	-1.07106	-0.378493	2.44614	0.188796	0.264724	-1.20072	-1.07484	1.1982	0.0916051	1.20565	-0.353114	-0.387285	-1.09476	2.28671	0.998046	0.365103
		padj	0.149682	0.00261308	0.00443013	0.0324263	0.543935	1.66198e-15	0.998843	0.917886	0.0244369	0.250614	0.0149324	0.927625	0.133891	0.709333	0.399598	0.00870444	2.05007e-11	0.000308909	0.688567
	Ityp-CE24	Log2FC	-0.292887	-0.524184	0.469382	-0.95389	-0.133937	1.40411	0.368621	0.0786438	-0.633576	-0.712338	0.135417	0.305691	0.207967	-0.544666	0.0759847	-0.667728	1.5166	1.28372	0.616769
		padj	0.702071	0.265405	0.398348	0.0270466	0.820158	6.8136e-16	0.998843	0.978998	0.115908	0.366181	0.791457	0.67182	0.813725	0.426148	0.869163	0.102755	1.73019e-18	2.40494e-12	0.161022
	Ityp-LIP1	Log2FC	-1.04033	-0.731335	2.63139	-0.971334	0.422413	3.61588	0.634731	0.409072	-0.536353	-0.624662	0.955125	0.320604	1.70254	-1.2987	0.986043	0.104081	3.91502	0.811021	0.0111948
		padj	0.145908	0.559064	0.00019386	0.453985	0.705842	0.00917273	0.998843	0.917886	0.684745	0.473598	0.153068	0.813789	0.14532	0.181321	0.281993	0.955478	7.88997e-06	0.566293	0.99801
	Ityp-LIP2	Log2FC	-0.800824	-0.871471	0.245202	1.02499	0.0454431	-0.776696	-1.29293	0.78557	-0.268838	1.13577	1.03622	-1.15137	2.59546	1.40901	-0.856894	2.65149	-2.28883	-2.06115	1.50781
		padj	0.329031	0.534413	0.75223	0.484616	0.97191	0.689142	0.521796	0.815311	0.86173	0.326526	0.102293	0.481039	0.0450188	0.540182	0.191926	0.00215206	0.105564	0.0413528	0.745113
