# Supplementary material for: Screening of Ester-Forming and Hydrolyzing Enzymes Linked to Pheromone Production in Ips typographus (Linnaeus, 1758)
Source: Research Square preprint supplement (doi:10.21203/rs.3.rs-7583299/v1), 2025-10-03
Supplement: Supplementary file 2 [file 789b3330336c5082b8712663.xlsx]

## Sheet: Main
	Supplementary Table S4.
	Results of quantitative real-time PCR (qRT-PCR) analysis of four esterase candidate genes Ityp-CE9, Ityp-CE10, Ityp-CE15, Ityp-CE21 in Ips typographus. Data for each gene are provided in separate worksheet tabs.
	The file includes raw Ct values, ΔCt calculations, normalized expression values (2^-ΔCt), and log-transformed data for each gene across biological replicates.
	The ribosomal protein gene RPL6 was used as the internal reference for normalization.
	Statistical analyses include One-way ANOVA (Analysis of Variance) with Tukey’s HSD test (p < 0.05) (Sheet: ANOVA) for treatment comparisons within one sex.
	Student’s t-tests (p < 0.05) were conducted to compare gene expression between sexes (see sheet: T-test).

## Sheet: Ityp-CE9
	Ityp-CE9
Biological Replicate	Tissue	Reference Gene	Cт		Target Gene	Cт		Δct		2^(-Δct)	Average 2^(-Δct)					STDEV	SE
1	Female Emerged Midgut	RPL6	20.1433		Ityp-CE9	25.0566		4.91335		0.0331845	0.0180165					0.0121885	0.00609424
2	Female Emerged Midgut	RPL6	18.3592		Ityp-CE9	24.5801		6.22093		0.0134064
3	Female Emerged Midgut	RPL6	18.228		Ityp-CE9	23.7972		5.56916		0.0210627
4	Female Emerged Midgut	RPL6	16.9005		Ityp-CE9	24.7248		7.82428		0.00441222
1	Female Emerged Fatbody	RPL6	18.7562		Ityp-CE9	23.4598		4.70358		0.0383779	0.021135					0.0129937	0.00649687
2	Female Emerged Fatbody	RPL6	17.6872		Ityp-CE9	23.2252		5.53798		0.021523
3	Female Emerged Fatbody	RPL6	18.4693		Ityp-CE9	24.306		5.83673		0.0174972
4	Female Emerged Fatbody	RPL6	17.3782		Ityp-CE9	24.5077		7.12949		0.00714183
1	Male Emerged Midgut	RPL6	17.9749		Ityp-CE9	24.0209		6.04603		0.0151343	0.0256313					0.0203954	0.0101977
2	Male Emerged Midgut	RPL6	19.3984		Ityp-CE9	25.1905		5.79211		0.0180469
3	Male Emerged Midgut	RPL6	20.8256		Ityp-CE9	24.9819		4.15633		0.0560815
4	Male Emerged Midgut	RPL6	19.1772		Ityp-CE9	25.4137		6.23653		0.0132623
1	Male Emerged Fatbody	RPL6	18.8066		Ityp-CE9	24.1194		5.31282		0.0251584	0.0657446					0.0637367	0.0318683
2	Male Emerged Fatbody	RPL6	20.6545		Ityp-CE9	23.3006		2.64612		0.159749
3	Male Emerged Fatbody	RPL6	17.1491		Ityp-CE9	22.345		5.19595		0.0272812
4	Male Emerged Fatbody	RPL6	21.3884		Ityp-CE9	25.6877		4.29931		0.0507901
1	Male Fed Midgut	RPL6	20.4283		Ityp-CE9	25.7744		5.34608		0.024585	0.0668965					0.0525615	0.0262807
2	Male Fed Midgut	RPL6	21.3559		Ityp-CE9	25.577		4.22112		0.0536188
3	Male Fed Midgut	RPL6	21.0552		Ityp-CE9	23.8555		2.80027		0.143561
4	Male Fed Midgut	RPL6	21.0662		Ityp-CE9	25.5141		4.44783		0.0458215
1	Male Fed Fatbody	RPL6	19.9025		Ityp-CE9	24.1543		4.25173		0.052493	0.367832					0.290276	0.145138
2	Male Fed Fatbody	RPL6	20.9		Ityp-CE9	23.1967		2.29667		0.203533
3	Male Fed Fatbody	RPL6	20.885		Ityp-CE9	21.7944		0.90938		0.532414
4	Male Fed Fatbody	RPL6	22.6296		Ityp-CE9	23.1799		0.550276		0.68289
1	Male Immature Midgut	RPL6	20.5765		Ityp-CE9	27.3696		6.79313		0.00901707	0.0236548					0.0177659	0.00888293
2	Male Immature Midgut	RPL6	23.5113		Ityp-CE9	29.6599		6.14861		0.0140957
3	Male Immature Midgut	RPL6	23.5951		Ityp-CE9	27.9475		4.35245		0.0489535
4	Male Immature Midgut	RPL6	23.766		Ityp-CE9	29.2365		5.47055		0.0225528
1	Male Immature Fatbody	RPL6	20.5938		Ityp-CE9	23.6782		3.08439		0.117898	0.180843					0.0749283	0.0374642
2	Male Immature Fatbody	RPL6	20.2666		Ityp-CE9	23.3908		3.12415		0.114693
3	Male Immature Fatbody	RPL6	21.0608		Ityp-CE9	23.1433		2.08245		0.236112
4	Male Immature Fatbody	RPL6	22.0177		Ityp-CE9	23.991		1.97331		0.254668
1	Female Immature Midgut	RPL6	22.1927		Ityp-CE9	28.0019		5.80918		0.0178346	0.132462					0.158468	0.0792342
2	Female Immature Midgut	RPL6	23.0746		Ityp-CE9	27.1721		4.09751		0.0584154
3	Female Immature Midgut	RPL6	22.2129		Ityp-CE9	25.7307		3.51774		0.0873082
4	Female Immature Midgut	RPL6	23.3846		Ityp-CE9	24.8335		1.44894		0.36629
1	Female Immature Fatbody	RPL6	21.0246		Ityp-CE9	24.2567		3.23213		0.106422	0.188522					0.14452	0.0722602
2	Female Immature Fatbody	RPL6	20.557		Ityp-CE9	23.3257		2.76868		0.146738
3	Female Immature Fatbody	RPL6	22.6795		Ityp-CE9	23.9908		1.31136		0.402941
4	Female Immature Fatbody	RPL6	20.6652		Ityp-CE9	24.0165		3.35127		0.0979865
1	Larvae L1	RPL6	20.6441		Ityp-CE9	23.991		3.34689		0.0982846	0.14364					0.0332213	0.0166107
2	Larvae L1	RPL6	20.5713		Ityp-CE9	23.1345		2.56324		0.169195
3	Larvae L1	RPL6	21.0432		Ityp-CE9	23.8868		2.8436		0.139313
4	Larvae L1	RPL6	20.6118		Ityp-CE9	23.1873		2.57547		0.167766
1	Larvae L2	RPL6	20.773		Ityp-CE9	24.2926		3.51958		0.0871969	0.130893					0.118745	0.0593727
2	Larvae L2	RPL6	20.8991		Ityp-CE9	25.0462		4.14705		0.0564435
3	Larvae L2	RPL6	21.5352		Ityp-CE9	25.3326		3.79746		0.07192
4	Larvae L2	RPL6	23.468		Ityp-CE9	25.1669		1.69894		0.308013
1	Larvae L3	RPL6	25.1096		Ityp-CE9	26.8744		1.76481		0.294266	0.185422					0.10366	0.05183
2	Larvae L3	RPL6	24.284		Ityp-CE9	27.8627		3.57868		0.0836971
3	Larvae L3	RPL6	24.8485		Ityp-CE9	26.8334		1.98491		0.252629
4	Larvae L3	RPL6	25.1216		Ityp-CE9	28.2917		3.17013		0.111095
1	Pupa	RPL6	21.0809		Ityp-CE9	29.8415		8.76059		0.00230569	0.00504553					0.00189264	0.00094632
2	Pupa	RPL6	22.3293		Ityp-CE9	29.6897		7.3604		0.00608553
3	Pupa	RPL6	21.3806		Ityp-CE9	28.9409		7.56026		0.00529829
4	Pupa	RPL6	22.2671		Ityp-CE9	29.5341		7.26698		0.00649261
1	Female Fed Midgut	RPL6	23.6807		Ityp-CE9	27.1735		3.49277		0.0888323	0.0774278					0.0353942	0.0158288
2	Female Fed Midgut	RPL6	22.3182		Ityp-CE9	27.1411		4.82297		0.0353298
3	Female Fed Midgut	RPL6	21.9508		Ityp-CE9	26.0264		4.07555		0.0593113
4	Female Fed Midgut	RPL6	23.8866		Ityp-CE9	26.8298		2.94317		0.130022
5	Female Fed Midgut	RPL6	25.3655		Ityp-CE9	29.1287		3.76329		0.0736437
1	Female Fed Fatbody	RPL6	21.5394		Ityp-CE9	24.9454		3.40595		0.0943422	0.0865136					0.0267285	0.0133643
2	Female Fed Fatbody	RPL6	22.8558		Ityp-CE9	25.9364		3.08068		0.118201
3	Female Fed Fatbody	RPL6	19.9475		Ityp-CE9	23.6106		3.66305		0.0789426
4	Female Fed Fatbody	RPL6	19.8335		Ityp-CE9	24.0293		4.1958		0.054568

## Sheet: Ityp-CE10
	Ityp-CE10
Biological Replicate	Tissue	Reference Gene	Cт		Target Gene	Cт		Δct		2^(-Δct)	Average 2^(-Δct)					STDEV	SE
1	Female Emerged Midgut	RPL6	20.1433		Ityp-CE10	28.5447		8.40138		0.00295756	0.00293919					0.00180975	0.000904877
2	Female Emerged Midgut	RPL6	18.3592		Ityp-CE10	26.9974		8.63821		0.00250981
3	Female Emerged Midgut	RPL6	18.228		Ityp-CE10	25.7795		7.55148		0.00533061
4	Female Emerged Midgut	RPL6	16.9005		Ityp-CE10	26.927		10.0265		0.000958783
1	Female Emerged Fatbody	RPL6	18.7562		Ityp-CE10	26.049		7.29279		0.00637753	0.00361527					0.00211168	0.00105584
2	Female Emerged Fatbody	RPL6	17.6872		Ityp-CE10	26.1346		8.44733		0.00286485
3	Female Emerged Fatbody	RPL6	18.4693		Ityp-CE10	26.4841		8.01476		0.00386648
4	Female Emerged Fatbody	RPL6	17.3782		Ityp-CE10	26.9087		9.53043		0.00135224
1	Male Emerged Midgut	RPL6	17.9749		Ityp-CE10	26.2934		8.31857		0.00313229	0.00336241					0.00135957	0.000679787
2	Male Emerged Midgut	RPL6	19.3984		Ityp-CE10	27.0599		7.66151		0.00493919
3	Male Emerged Midgut	RPL6	20.8256		Ityp-CE10	28.8986		8.07295		0.00371363
4	Male Emerged Midgut	RPL6	19.1772		Ityp-CE10	28.4079		9.23066		0.00166454
1	Male Emerged Fatbody	RPL6	18.8066		Ityp-CE10	27.1416		8.33503		0.00309675	0.00843871					0.00609311	0.00304656
2	Male Emerged Fatbody	RPL6	20.6545		Ityp-CE10	26.6068		5.95233		0.0161499
3	Male Emerged Fatbody	RPL6	17.1491		Ityp-CE10	25.0981		7.94898		0.00404686
4	Male Emerged Fatbody	RPL6	21.3884		Ityp-CE10	27.9672		6.57878		0.0104614
1	Male Fed Midgut	RPL6	20.4283		Ityp-CE10	26.4833		6.05499		0.0150406	0.0350103					0.0192324	0.0096162
2	Male Fed Midgut	RPL6	21.3559		Ityp-CE10	26.1514		4.79545		0.0360101
3	Male Fed Midgut	RPL6	21.0552		Ityp-CE10	25.0956		4.04042		0.0607731
4	Male Fed Midgut	RPL6	21.0662		Ityp-CE10	26.2135		5.14727		0.0282173
1	Male Fed Fatbody	RPL6	19.9025		Ityp-CE10	27.3263		7.42377		0.005824	0.0461615					0.0314332	0.0157166
2	Male Fed Fatbody	RPL6	20.9		Ityp-CE10	25.6483		4.74828		0.037207
3	Male Fed Fatbody	RPL6	20.885		Ityp-CE10	24.8014		3.91646		0.066226
4	Male Fed Fatbody	RPL6	22.6296		Ityp-CE10	26.3591		3.7295		0.0753891
1	Male Immature Midgut	RPL6	20.5765		Ityp-CE10	29.9726		9.39607		0.00148423	0.0395251					0.0258824	0.0129412
2	Male Immature Midgut	RPL6	23.5113		Ityp-CE10	27.985		4.47366		0.0450084
3	Male Immature Midgut	RPL6	23.5951		Ityp-CE10	27.7879		4.19282		0.0546807
4	Male Immature Midgut	RPL6	23.766		Ityp-CE10	27.9007		4.13474		0.0569272
1	Male Immature Fatbody	RPL6	20.5938		Ityp-CE10	24.7411		4.1473		0.0564336	0.0585912					0.0258832	0.0129416
2	Male Immature Fatbody	RPL6	20.2666		Ityp-CE10	25.0829		4.81625		0.0354947
3	Male Immature Fatbody	RPL6	21.0608		Ityp-CE10	24.4533		3.39249		0.0952269
4	Male Immature Fatbody	RPL6	22.0177		Ityp-CE10	26.4224		4.40478		0.0472094
1	Female Immature Midgut	RPL6	22.1927		Ityp-CE10	28.6412		6.44847		0.0114503	0.0594793					0.0822355	0.0411178
2	Female Immature Midgut	RPL6	23.0746		Ityp-CE10	28.5819		5.50724		0.0219865
3	Female Immature Midgut	RPL6	22.2129		Ityp-CE10	27.7278		5.51486		0.0218706
4	Female Immature Midgut	RPL6	23.3846		Ityp-CE10	25.8378		2.45316		0.18261
1	Female Immature Fatbody	RPL6	21.0246		Ityp-CE10	27.7911		6.76652		0.00918493	0.0191195					0.0118597	0.00592985
2	Female Immature Fatbody	RPL6	20.557		Ityp-CE10	27.007		6.45		0.0114382
3	Female Immature Fatbody	RPL6	22.6795		Ityp-CE10	27.5031		4.82365		0.0353132
4	Female Immature Fatbody	RPL6	20.6652		Ityp-CE10	26.2706		5.6053		0.0205416
1	Larvae L1	RPL6	20.6441		Ityp-CE10	27.1465		6.50233		0.0110307	0.0159186					0.0047349	0.00236745
2	Larvae L1	RPL6	20.5713		Ityp-CE10	26.3984		5.82714		0.0176139
3	Larvae L1	RPL6	21.0432		Ityp-CE10	27.2748		6.23158		0.0133079
4	Larvae L1	RPL6	20.6118		Ityp-CE10	26.1366		5.52472		0.0217218
1	Larvae L2	RPL6	20.773		Ityp-CE10	26.7798		6.00679		0.0155516	0.0191287					0.0134997	0.00674985
2	Larvae L2	RPL6	20.8991		Ityp-CE10	27.7899		6.89074		0.00842713
3	Larvae L2	RPL6	21.5352		Ityp-CE10	27.7281		6.19295		0.013669
4	Larvae L2	RPL6	23.468		Ityp-CE10	28.1533		4.68531		0.038867
1	Larvae L3	RPL6	25.1096		Ityp-CE10	28.6561		3.54655		0.0855821	0.073177					0.0182236	0.00911178
2	Larvae L3	RPL6	24.284		Ityp-CE10	28.7231		4.43909		0.0461001
3	Larvae L3	RPL6	24.8485		Ityp-CE10	28.4994		3.65087		0.0796122
4	Larvae L3	RPL6	25.1216		Ityp-CE10	28.7402		3.61859		0.0814135
																0.00278316	0.00139158
1	Pupa	RPL6	21.0809		Ityp-CE10	27.9353		6.85442		0.00864198	0.00611912
2	Pupa	RPL6	22.3293		Ityp-CE10	29.6374		7.30814		0.00631002
3	Pupa	RPL6	21.3806		Ityp-CE10	29.7147		8.33405		0.00309885
4	Pupa	RPL6	22.2671		Ityp-CE10	29.549		7.28195		0.00642561
1	Female Fed Midgut	RPL6	23.6807		Ityp-CE10	30.9828		7.30207		0.0063366	0.012182					0.00893378	0.00399531
2	Female Fed Midgut	RPL6	22.3182		Ityp-CE10	30.5187		8.2005		0.0033994
3	Female Fed Midgut	RPL6	21.9508		Ityp-CE10	28.6157		6.66488		0.00985534
4	Female Fed Midgut	RPL6	23.8866		Ityp-CE10	29.1474		5.26082		0.0260817
5	Female Fed Midgut	RPL6	25.3655		Ityp-CE10	31.4018		6.0363		0.0152367
1	Female Fed Fatbody	RPL6	21.5394		Ityp-CE10	27.4375		5.89808		0.0167688	0.0116754					0.0060611	0.00303055
2	Female Fed Fatbody	RPL6	22.8558		Ityp-CE10	28.7738		5.91809		0.0165378
3	Female Fed Fatbody	RPL6	19.9475		Ityp-CE10	26.7354		6.78785		0.00905012
4	Female Fed Fatbody	RPL6	19.8335		Ityp-CE10	27.6799		7.8464		0.00434509

## Sheet: Ityp-CE13
		Ityp-CE21
	Biological Replicate	Tissue	Reference Gene	Cт		Target Gene	Cт		Δct		2^(-Δct)	Average 2^(-Δct)					STDEV	SE
	1	Female Emerged Midgut	RPL6	19.8986		Ityp-CE13	27.2473		7.34868		0.00613516	0.014982					0.00920176	0.00460088
	2	Female Emerged Midgut	RPL6	19.7776		Ityp-CE13	25.6367		5.85904		0.0172287
	3	Female Emerged Midgut	RPL6	18.291		Ityp-CE13	23.5066		5.21565		0.0269111
	4	Female Emerged Midgut	RPL6	17.9487		Ityp-CE13	24.6435		6.69481		0.00965297
	1	Female Emerged Fatbody	RPL6	19.4607		Ityp-CE13	26.9629		7.50219		0.00551591	0.00526175					0.000329445	0.000164722
	2	Female Emerged Fatbody	RPL6	18.4073		Ityp-CE13	25.9307		7.5234		0.0054354
	3	Female Emerged Fatbody	RPL6	19.0878		Ityp-CE13	26.6444		7.55659		0.00531179
	4	Female Emerged Fatbody	RPL6	18.8669		Ityp-CE13	26.5745		7.7076		0.00478389
	1	Male Emerged Midgut	RPL6	19.8391		Ityp-CE13	26.5557		6.71668		0.00950774	0.30242					0.57922	0.28961
	2	Male Emerged Midgut	RPL6	20.2415		Ityp-CE13	26.3827		6.14115		0.0141687
	3	Male Emerged Midgut	RPL6	21.2996		Ityp-CE13	27.3818		6.08227		0.0147589
	4	Male Emerged Midgut	RPL6	20.5986		Ityp-CE13	20.3706		-0.228041		1.17124
	1	Male Emerged Fatbody	RPL6	21.2767		Ityp-CE13	30.4891		9.21236		0.00168578	0.00132588					0.000751789	0.000375894
	2	Male Emerged Fatbody	RPL6	20.6631		Ityp-CE13	29.9355		9.27241		0.00161707
	3	Male Emerged Fatbody	RPL6	19.2317		Ityp-CE13	31.4931		12.2613		0.000203691
	4	Male Emerged Fatbody	RPL6	22.4409		Ityp-CE13	31.5611		9.12021		0.00179697
	1	Male Fed Midgut	RPL6	34.4881		Ityp-CE13	31.6297		-2.8584		7.25211	3.15322					3.39733	1.69867
	2	Male Fed Midgut	RPL6	21.8289		Ityp-CE13	27.4931		5.66414		0.0197207
	3	Male Fed Midgut	RPL6	31.1931		Ityp-CE13	31.6493		0.456257		0.728875
	4	Male Fed Midgut	RPL6	33.5994		Ityp-CE13	31.394		-2.20544		4.61216
	1	Male Fed Fatbody	RPL6	20.3838		Ityp-CE13	25.8511		5.46726		0.0226043	0.0660163					0.0482268	0.0241134
	2	Male Fed Fatbody	RPL6	20.7173		Ityp-CE13	25.306		4.5887		0.0415588
	3	Male Fed Fatbody	RPL6	20.9054		Ityp-CE13	24.8083		3.90296		0.0668485
	4	Male Fed Fatbody	RPL6	22.7576		Ityp-CE13	25.6676		2.90992		0.133054
	1	Male Immature Midgut	RPL6	31.7983		Ityp-CE13	31.5062		-0.292049		1.22438	0.425704					0.532722	0.266361
	2	Male Immature Midgut	RPL6	25.7174		Ityp-CE13	28.5887		2.87122		0.136671
	3	Male Immature Midgut	RPL6	26.8819		Ityp-CE13	29.3754		2.49348		0.177578
	4	Male Immature Midgut	RPL6	26.6864		Ityp-CE13	29.2929		2.60658		0.164188
	1	Male Immature Fatbody	RPL6	21.8776		Ityp-CE13	25.5067		3.62914		0.0808201	0.106981					0.0284959	0.0142479
	2	Male Immature Fatbody	RPL6	22.1763		Ityp-CE13	25.3459		3.16966		0.111131
	3	Male Immature Fatbody	RPL6	22.3571		Ityp-CE13	25.14		2.78288		0.145301
	4	Male Immature Fatbody	RPL6	22.9538		Ityp-CE13	26.417		3.46319		0.0906724
	1	Female Immature Midgut	RPL6	24.4335		Ityp-CE13	27.5818		3.14824		0.112793	0.118547					0.0494514	0.0247257
	2	Female Immature Midgut	RPL6	25.0332		Ityp-CE13	28.5989		3.56567		0.0844551
	3	Female Immature Midgut	RPL6	24.2641		Ityp-CE13	27.7909		3.52675		0.0867644
	4	Female Immature Midgut	RPL6	23.9562		Ityp-CE13	26.3508		2.39459		0.190177
	1	Female Immature Fatbody	RPL6	22.9045		Ityp-CE13	27.3177		4.41322		0.0469342	0.0426739					0.0047777	0.00238885
	2	Female Immature Fatbody	RPL6	22.1965		Ityp-CE13	26.8783		4.68171		0.038964
	3	Female Immature Fatbody	RPL6	23.3522		Ityp-CE13	28.065		4.71287		0.0381316
	4	Female Immature Fatbody	RPL6	22.7205		Ityp-CE13	27.142		4.4215		0.0466656
	1	Larvae L1	RPL6	22.9578		Ityp-CE13	28.718		5.76024		0.01845	0.0187009					0.0103321	0.00516603
	2	Larvae L1	RPL6	22.0116		Ityp-CE13	27.8973		5.88564		0.0169139
	3	Larvae L1	RPL6	22.1791		Ityp-CE13	27.1329		4.95375		0.0322681
	4	Larvae L1	RPL6	21.819		Ityp-CE13	28.9425		7.12353		0.00717142
	1	Larvae L2	RPL6	22.925		Ityp-CE13	27.7429		4.81787		0.035455	0.0294768					0.00523577	0.00261789
	2	Larvae L2	RPL6	23.1154		Ityp-CE13	28.0744		4.95894		0.0321522
	3	Larvae L2	RPL6	23.5288		Ityp-CE13	28.7873		5.25844		0.0261247
	4	Larvae L2	RPL6	24.1387		Ityp-CE13	29.509		5.37033		0.0241752
	1	Larvae L3	RPL6	24.431		Ityp-CE13	29.6838		5.25288		0.0262257	0.0411918					0.0184694	0.00923468
	2	Larvae L3	RPL6	23.652		Ityp-CE13	28.7859		5.13389		0.0284803
	3	Larvae L3	RPL6	24.5947		Ityp-CE13	28.5091		3.91448		0.0663169
	4	Larvae L3	RPL6	25.7587		Ityp-CE13	30.2734		4.51476		0.0437443
	1	Pupa	RPL6	21.9673		Ityp-CE13	32.436		10.4686		0.000705707	0.000679509					7.90676e-05	3.95338e-05
	2	Pupa	RPL6	22.7153		Ityp-CE13	33.0876		10.3723		0.000754418
	3	Pupa	RPL6	21.8949		Ityp-CE13	32.6758		10.7809		0.00056835
	4	Pupa	RPL6	22.6776		Ityp-CE13	33.1796		10.502		0.00068956
	1	Female Fed Midgut	RPL6	24.7927		Ityp-CE13	31.6627		6.87004		0.00854895	0.027821					0.0236747	0.0118374
	2	Female Fed Midgut	RPL6	22.4982		Ityp-CE13	28.7103		6.21205		0.0134892
	3	Female Fed Midgut	RPL6	26.8956		Ityp-CE13	32.0443		5.14864		0.0281906
	4	Female Fed Midgut	RPL6	22.8791		Ityp-CE13	26.9128		4.03374		0.0610554
	1	Female Fed Fatbody	RPL6	21.9278		Ityp-CE13	28.7795		6.85173		0.00865812	0.0187856					0.0111613	0.00558066
	2	Female Fed Fatbody	RPL6	23.9172		Ityp-CE13	28.8244		4.90728		0.0333243
	3	Female Fed Fatbody	RPL6	21.6565		Ityp-CE13	27.1905		5.53398		0.0215827
	4	Female Fed Fatbody	RPL6	22.3714		Ityp-CE13	28.8039		6.43258		0.0115771

## Sheet: Ityp-CE15
	Ityp-CE15
Biological Replicate	Tissue	Reference Gene	Cт		Target Gene	Cт		Δct		2^(-Δct)	Average 2^(-Δct)					STDEV	SE
1	Female Emerged Midgut	RPL6	20.1433		Ityp-CE15	24.9819		4.83866		0.0349478	0.0137752					0.0150048	0.00750241
2	Female Emerged Midgut	RPL6	18.3592		Ityp-CE15	30.2439		11.8847		0.000264455
3	Female Emerged Midgut	RPL6	18.228		Ityp-CE15	24.5263		6.29826		0.0127067
4	Female Emerged Midgut	RPL6	16.9005		Ityp-CE15	24.022		7.12145		0.00718172
1	Female Emerged Fatbody	RPL6	18.7562		Ityp-CE15	21.9509		3.19468		0.109221	0.0754116					0.0250566	0.0125283
2	Female Emerged Fatbody	RPL6	17.6872		Ityp-CE15	21.7223		4.03509		0.0609981
3	Female Emerged Fatbody	RPL6	18.4693		Ityp-CE15	22.7184		4.24914		0.0525874
4	Female Emerged Fatbody	RPL6	17.3782		Ityp-CE15	21.0432		3.66492		0.0788404
1	Male Emerged Midgut	RPL6	19.9463		Ityp-CE15	25.9201		5.97386		0.0159106	0.0199634					0.00278743	0.00139372
2	Male Emerged Midgut	RPL6	19.6373		Ityp-CE15	25.1399		5.50265		0.0220566
3	Male Emerged Midgut	RPL6	20.2		Ityp-CE15	25.7406		5.54065		0.0214832
4	Male Emerged Midgut	RPL6	19.3293		Ityp-CE15	24.9444		5.61507		0.0204031
1	Male Emerged Fatbody	RPL6	18.8066		Ityp-CE15	23.3833		4.57673		0.041905	0.128459					0.101632	0.0508161
2	Male Emerged Fatbody	RPL6	20.6545		Ityp-CE15	23.01		2.35554		0.195394
3	Male Emerged Fatbody	RPL6	17.1491		Ityp-CE15	21.7483		4.59926		0.0412558
4	Male Emerged Fatbody	RPL6	21.3884		Ityp-CE15	23.4759		2.08754		0.235282
1	Male Fed Midgut	RPL6	20.4283		Ityp-CE15	31.886		11.4577		0.000355552	0.00114472					0.000903799	0.0004519
2	Male Fed Midgut	RPL6	21.3559		Ityp-CE15	31.5365		10.1805		0.000861687
3	Male Fed Midgut	RPL6	21.0552		Ityp-CE15	31.1491		10.0939		0.000915023
4	Male Fed Midgut	RPL6	21.0662		Ityp-CE15	29.7412		8.675		0.00244661
1	Male Fed Fatbody	RPL6	19.9025		Ityp-CE15	25.6786		5.77606		0.0182487	0.118091					0.0736869	0.0368435
2	Male Fed Fatbody	RPL6	20.9		Ityp-CE15	23.8968		2.99677		0.12528
3	Male Fed Fatbody	RPL6	20.885		Ityp-CE15	23.7957		2.91073		0.132979
4	Male Fed Fatbody	RPL6	22.6296		Ityp-CE15	24.9817		2.35213		0.195857
1	Male Immature Midgut	RPL6	20.5765		Ityp-CE15	31.1296		10.5531		0.000665591	0.00786584					0.0135754	0.00678768
2	Male Immature Midgut	RPL6	23.5113		Ityp-CE15	28.6583		5.14697		0.0282234
3	Male Immature Midgut	RPL6	23.5951		Ityp-CE15	33.0414		9.44633		0.00143341
4	Male Immature Midgut	RPL6	23.766		Ityp-CE15	33.5415		9.7755		0.00114099
1	Male Immature Fatbody	RPL6	20.5938		Ityp-CE15	26.043		5.4492		0.022889	0.0308483					0.00897258	0.00448629
2	Male Immature Fatbody	RPL6	20.2666		Ityp-CE15	25.6469		5.38023		0.0240098
3	Male Immature Fatbody	RPL6	21.0608		Ityp-CE15	25.9		4.83912		0.0349365
4	Male Immature Fatbody	RPL6	22.0177		Ityp-CE15	26.6064		4.58874		0.0415578
1	Female Immature Midgut	RPL6	22.1927		Ityp-CE15	31.3927		9.19997		0.00170033	0.00840524					0.00890357	0.00445179
2	Female Immature Midgut	RPL6	23.0746		Ityp-CE15	31.3583		8.28364		0.00320905
3	Female Immature Midgut	RPL6	22.2129		Ityp-CE15	29.2791		7.06621		0.00746205
4	Female Immature Midgut	RPL6	23.3846		Ityp-CE15	28.941		5.55643		0.0212495
1	Female Immature Fatbody	RPL6	21.0246		Ityp-CE15	27.6286		6.60402		0.01028	0.0120183					0.00638517	0.00319258
2	Female Immature Fatbody	RPL6	20.557		Ityp-CE15	26.9057		6.34865		0.0122706
3	Female Immature Fatbody	RPL6	22.6795		Ityp-CE15	28.2915		5.61201		0.0204464
4	Female Immature Fatbody	RPL6	20.6652		Ityp-CE15	28.2873		7.62204		0.0050762
1	Larvae L1	RPL6	20.6441		Ityp-CE15	36.3878		15.7436		1.82265e-05	4.72248e-05					3.09246e-05	1.54623e-05
2	Larvae L1	RPL6	20.5713		Ityp-CE15	35.1209		14.5496		4.16986e-05
3	Larvae L1	RPL6	21.0432		Ityp-CE15	35.7263		14.6831		3.80147e-05
4	Larvae L1	RPL6	20.6118		Ityp-CE15	34.0363		13.4244		9.09595e-05
1	Larvae L2	RPL6	20.773		Ityp-CE15	35.4627		14.6897		3.78414e-05	8.54175e-05					8.5569e-05	4.27845e-05
2	Larvae L2	RPL6	20.8991		Ityp-CE15	34.9687		14.0696		5.81621e-05
3	Larvae L2	RPL6	21.5352		Ityp-CE15	36.4248		14.8896		3.29446e-05
4	Larvae L2	RPL6	23.468		Ityp-CE15	35.6667		12.1987		0.000212722
1	Larvae L3	RPL6	25.1096		Ityp-CE15	31.6268		6.51721		0.0109176	0.0351433					0.040076	0.0231379
2	Larvae L3	RPL6	24.284		Ityp-CE15
3	Larvae L3	RPL6	24.8485		Ityp-CE15	31.1016		6.25312		0.0131106
4	Larvae L3	RPL6	25.1216		Ityp-CE15	28.7404		3.6188		0.0814017
1	Pupa	RPL6	21.0809		Ityp-CE15	31.576		10.4951		0.000692874	0.00124878					0.00142648	0.000713239
2	Pupa	RPL6	22.3293		Ityp-CE15	33.936		11.6067		0.000320648
3	Pupa	RPL6	21.3806		Ityp-CE15	32.068		10.6874		0.000606435
4	Pupa	RPL6	22.2671		Ityp-CE15	30.4779		8.21083		0.00337515
1	Female Fed Midgut	RPL6	23.6807		Ityp-CE15	29.3442		5.66356		0.0197287	0.00802434					0.00816241	0.00365034
2	Female Fed Midgut	RPL6	22.3182		Ityp-CE15	28.8073		6.48918		0.0111317
3	Female Fed Midgut	RPL6	21.9508		Ityp-CE15	35.1996		13.2487		0.000102739
4	Female Fed Midgut	RPL6	23.8866		Ityp-CE15	34.8671		10.9805		0.000494929
5	Female Fed Midgut	RPL6	25.3655		Ityp-CE15	32.2163		6.85081		0.00866362
1	Female Fed Fatbody	RPL6	21.5394		Ityp-CE15	27.113		5.57363		0.0209977	0.017955					0.0101645	0.00508227
2	Female Fed Fatbody	RPL6	22.8558		Ityp-CE15	27.8859		5.03016		0.0306034
3	Female Fed Fatbody	RPL6	19.9475		Ityp-CE15	26.2043		6.25684		0.0130769
4	Female Fed Fatbody	RPL6	19.8335		Ityp-CE15	26.9629		7.12942		0.00714217

## Sheet: Ityp-CE16
		Ityp-CE21
	Biological Replicate	Tissue	Reference Gene	Cт		Target Gene	Cт		Δct		2^(-Δct)	Average 2^(-Δct)					STDEV	SE
	1	Female Emerged Midgut	RPL6	19.8986		Ityp-CE16	23.5397		3.64108		0.0801539	0.081977					0.0355239	0.0177619
	2	Female Emerged Midgut	RPL6	19.7776		Ityp-CE16	22.9806		3.20299		0.108594
	3	Female Emerged Midgut	RPL6	18.291		Ityp-CE16	21.5184		3.22737		0.106774
	4	Female Emerged Midgut	RPL6	17.9487		Ityp-CE16	22.8971		4.94845		0.0323868
	1	Female Emerged Fatbody	RPL6	19.4607		Ityp-CE16	29.2125		9.75177		0.00115991	0.00147363					0.000632384	0.000316192
	2	Female Emerged Fatbody	RPL6	18.4073		Ityp-CE16	27.4242		9.0169		0.00193038
	3	Female Emerged Fatbody	RPL6	19.0878		Ityp-CE16	28.0065		8.91868		0.00206638
	4	Female Emerged Fatbody	RPL6	18.8669		Ityp-CE16	29.2712		10.4043		0.000737873
	1	Male Emerged Midgut	RPL6	19.8391		Ityp-CE16	21.4128		1.57377		0.33593	0.529698					0.303506	0.151753
	2	Male Emerged Midgut	RPL6	20.2415		Ityp-CE16	21.6958		1.4543		0.364933
	3	Male Emerged Midgut	RPL6	21.2996		Ityp-CE16	21.3281		0.0285206		0.980425
	4	Male Emerged Midgut	RPL6	20.5986		Ityp-CE16	21.7913		1.19263		0.437505
	1	Male Emerged Fatbody	RPL6	21.2767		Ityp-CE16	29.1102		7.83346		0.00438422	0.00578303					0.00381846	0.00190923
	2	Male Emerged Fatbody	RPL6	20.6631		Ityp-CE16	27.3162		6.65313		0.00993594
	3	Male Emerged Fatbody	RPL6	19.2317		Ityp-CE16	28.9523		9.72059		0.00118526
	4	Male Emerged Fatbody	RPL6	22.4409		Ityp-CE16	29.4756		7.03473		0.00762669
	1	Male Fed Midgut	RPL6	34.4881		Ityp-CE16	29.5486		-4.9395		30.6857	14.4434					15.1438	7.57189
	2	Male Fed Midgut	RPL6	21.8289		Ityp-CE16	23.0155		1.18652		0.439363
	3	Male Fed Midgut	RPL6	31.1931		Ityp-CE16	29.7579		-1.43523		2.70425
	4	Male Fed Midgut	RPL6	33.5994		Ityp-CE16	29.0178		-4.58162		23.9444
	1	Male Fed Fatbody	RPL6	20.3838		Ityp-CE16	27.9652		7.58141		0.00522118	0.0187356					0.0148514	0.00742568
	2	Male Fed Fatbody	RPL6	20.7173		Ityp-CE16	27.9249		7.20764		0.00676527
	3	Male Fed Fatbody	RPL6	20.9054		Ityp-CE16	25.7911		4.88573		0.0338258
	4	Male Fed Fatbody	RPL6	22.7576		Ityp-CE16	27.859		5.10135		0.0291301
	1	Male Immature Midgut	RPL6	31.7983		Ityp-CE16	29.07		-2.72823		6.62642	2.53527					2.72941	1.36471
	2	Male Immature Midgut	RPL6	25.7174		Ityp-CE16	25.43		-0.287403		1.22044
	3	Male Immature Midgut	RPL6	26.8819		Ityp-CE16	26.8435		-0.0383339		1.02693
	4	Male Immature Midgut	RPL6	26.6864		Ityp-CE16	26.3446		-0.341768		1.26731
	1	Male Immature Fatbody	RPL6	21.8776		Ityp-CE16	27.0393		5.16177		0.0279352	0.0439034					0.0157051	0.00785254
	2	Male Immature Fatbody	RPL6	22.1763		Ityp-CE16	26.1075		3.93121		0.0655521
	3	Male Immature Fatbody	RPL6	22.3571		Ityp-CE16	26.9531		4.59601		0.0413488
	4	Male Immature Fatbody	RPL6	22.9538		Ityp-CE16	27.5698		4.61608		0.0407777
	1	Female Immature Midgut	RPL6	24.4335		Ityp-CE16	24.6702		0.23671		0.848679	1.00587					0.70293	0.351465
	2	Female Immature Midgut	RPL6	25.0332		Ityp-CE16	26.162		1.12878		0.457301
	3	Female Immature Midgut	RPL6	24.2641		Ityp-CE16	24.8098		0.545673		0.685072
	4	Female Immature Midgut	RPL6	23.9562		Ityp-CE16	22.933		-1.02319		2.03241
	1	Female Immature Fatbody	RPL6	22.9045		Ityp-CE16	29.5239		6.61944		0.0101707	0.012529					0.00438041	0.0021902
	2	Female Immature Fatbody	RPL6	22.1965		Ityp-CE16	29.2253		7.02877		0.00765825
	3	Female Immature Fatbody	RPL6	23.3522		Ityp-CE16	29.2153		5.86312		0.0171801
	4	Female Immature Fatbody	RPL6	22.7205		Ityp-CE16	28.7691		6.04865		0.0151069
	1	Larvae L1	RPL6	22.9578		Ityp-CE16	26.4574		3.49962		0.0884114	0.0522256					0.0241483	0.0120742
	2	Larvae L1	RPL6	22.0116		Ityp-CE16	26.5978		4.58617		0.0416317
	3	Larvae L1	RPL6	22.1791		Ityp-CE16	26.8582		4.67906		0.0390357
	4	Larvae L1	RPL6	21.819		Ityp-CE16	26.4692		4.65023		0.0398236
	1	Larvae L2	RPL6	22.925		Ityp-CE16	27.991		5.06603		0.029852	0.0755323					0.0357612	0.0178806
	2	Larvae L2	RPL6	23.1154		Ityp-CE16	26.9442		3.82876		0.0703766
	3	Larvae L2	RPL6	23.5288		Ityp-CE16	26.6412		3.11238		0.115633
	4	Larvae L2	RPL6	24.1387		Ityp-CE16	27.6737		3.53503		0.0862678
	1	Larvae L3	RPL6	24.431		Ityp-CE16	26.3596		1.92866		0.262674	0.214571					0.0521701	0.0260851
	2	Larvae L3	RPL6	23.652		Ityp-CE16	26.3374		2.68538		0.155461
	3	Larvae L3	RPL6	24.5947		Ityp-CE16	27.0198		2.42517		0.186188
	4	Larvae L3	RPL6	25.7587		Ityp-CE16	27.736		1.97731		0.253963
	1	Pupa	RPL6	21.9673		Ityp-CE16	28.9486		6.98132		0.00791431	0.0104132					0.00266326	0.00133163
	2	Pupa	RPL6	22.7153		Ityp-CE16	29.1888		6.47358		0.0112528
	3	Pupa	RPL6	21.8949		Ityp-CE16	28.74		6.84511		0.00869793
	4	Pupa	RPL6	22.6776		Ityp-CE16	28.8581		6.18047		0.0137877
	1	Female Fed Midgut	RPL6	24.7927		Ityp-CE16	27.7426		2.94988		0.129419	0.483261					0.375311	0.187656
	2	Female Fed Midgut	RPL6	22.4982		Ityp-CE16	24.8585		2.36025		0.194757
	3	Female Fed Midgut	RPL6	26.8956		Ityp-CE16	27.1015		0.205868		0.867017
	4	Female Fed Midgut	RPL6	22.8791		Ityp-CE16	23.3099		0.430801		0.74185
	1	Female Fed Fatbody	RPL6	21.9278		Ityp-CE16	31.4065		9.47874		0.00140157	0.00618908					0.00843347	0.00421673
	2	Female Fed Fatbody	RPL6	23.9172		Ityp-CE16	29.649		5.7319		0.018816
	3	Female Fed Fatbody	RPL6	21.6565		Ityp-CE16	30.7012		9.04466		0.00189359
	4	Female Fed Fatbody	RPL6	22.3714		Ityp-CE16	30.9338		8.56242		0.00264517

## Sheet: Ityp-CE20
		Ityp-CE21
	Biological Replicate	Tissue	Reference Gene	Cт		Target Gene	Cт		Δct		2^(-Δct)	Average 2^(-Δct)					STDEV	SE
	1	Female Emerged Midgut	RPL6	20.04			22.9892		2.94925		0.129475	0.119347					0.0681466	0.0340733
	2	Female Emerged Midgut	RPL6	20.2671			23.5889		3.32187		0.100004
	3	Female Emerged Midgut	RPL6	18.9262			23.4975		4.57131		0.0420628
	4	Female Emerged Midgut	RPL6	18.7675			21.0479		2.28035		0.205847
	1	Female Emerged Fatbody	RPL6	20.0992			23.6785		3.57929		0.0836615	0.0753996					0.0270758	0.0135379
	2	Female Emerged Fatbody	RPL6	18.8708			22.0579		3.18705		0.1098
	3	Female Emerged Fatbody	RPL6	19.4301			23.5279		4.09781		0.058403
	4	Female Emerged Fatbody	RPL6	19.3443			23.674		4.32964		0.0497334
	1	Male Emerged Midgut	RPL6	20.4455			27.8313		7.38581		0.00597931	0.0161974					0.0219619	0.010981
	2	Male Emerged Midgut	RPL6	20.6891			25.0377		4.34864		0.0490827
	3	Male Emerged Midgut	RPL6	21.4326			29.6279		8.19531		0.00341167
	4	Male Emerged Midgut	RPL6	21.1339			28.4407		7.30684		0.00631569
	1	Male Emerged Fatbody	RPL6	22.1544			27.4264		5.27194		0.0258815	0.0149837					0.00828499	0.00414249
	2	Male Emerged Fatbody	RPL6	21.5677			28.9594		7.39168		0.00595501
	3	Male Emerged Fatbody	RPL6	20.3668			26.3835		6.01671		0.0154451
	4	Male Emerged Fatbody	RPL6	22.9441			29.2485		6.30436		0.0126531
	1	Male Fed Midgut	RPL6	34.9248			32.7412		-2.18359		4.54281	4.77606					5.1634	2.5817
	2	Male Fed Midgut	RPL6	23.0843			27.6591		4.57478		0.0419619
	3	Male Fed Midgut	RPL6	31.9639			30.638		-1.32591		2.50691
	4	Male Fed Midgut	RPL6	36.092			32.5055		-3.58647		12.0126
	1	Male Fed Fatbody	RPL6	21.4103			30.5549		9.14468		0.00176676	0.00725576					0.00575725	0.00287862
	2	Male Fed Fatbody	RPL6	21.829			28.8964		7.06739		0.00745594
	3	Male Fed Fatbody	RPL6	21.508			29.2588		7.75083		0.00464268
	4	Male Fed Fatbody	RPL6	23.1899			29.2337		6.04381		0.0151577
	1	Male Immature Midgut	RPL6	31.1274			33.6309		2.50347		0.176352	0.0618513					0.0764284	0.0382142
	2	Male Immature Midgut	RPL6	25.8717			31.6425		5.77085		0.0183147
	3	Male Immature Midgut	RPL6	26.9941			32.2483		5.2542		0.0262016
	4	Male Immature Midgut	RPL6	26.5275			31.7634		5.23586		0.0265369
	1	Male Immature Fatbody	RPL6	21.7353			30.3164		8.58104		0.00261125	0.00400129					0.00183309	0.000916543
	2	Male Immature Fatbody	RPL6	22.0057			30.5226		8.51688		0.00273
	3	Male Immature Fatbody	RPL6	22.1088			30.0358		7.92698		0.00410906
	4	Male Immature Fatbody	RPL6	22.9266			30.1799		7.25322		0.00655484
	1	Female Immature Midgut	RPL6	24.5016			31.582		7.08044		0.00738882	0.0106035					0.00417846	0.00208923
	2	Female Immature Midgut	RPL6	25.1256			31.4819		6.3563		0.0122057
	3	Female Immature Midgut	RPL6	24.7914			31.9415		7.15009		0.00704056
	4	Female Immature Midgut	RPL6	24.3167			30.3026		5.98588		0.0157787
	1	Female Immature Fatbody	RPL6	23.2532			30.489		7.23576		0.00663469	0.00462					0.00240612	0.00120306
	2	Female Immature Fatbody	RPL6	22.1607			31.3534		9.1927		0.00170892
	3	Female Immature Fatbody	RPL6	23.1255			30.3782		7.25275		0.00655701
	4	Female Immature Fatbody	RPL6	22.709			30.8351		8.12608		0.00357938
	1	Larvae L1	RPL6	23.2825			32.5867		9.30414		0.00158188	0.0346804					0.0666201	0.0333101
	2	Larvae L1	RPL6	22.246			31.8536		9.6076		0.00128182
	3	Larvae L1	RPL6	22.452			25.3451		2.89314		0.13461
	4	Larvae L1	RPL6	22.4313			32.0779		9.64652		0.00124769
	1	Larvae L2	RPL6	23.5488			31.6494		8.10057		0.00364321	0.00466743					0.00307357	0.00153678
	2	Larvae L2	RPL6	23.3677			30.1538		6.78607		0.00906125
	3	Larvae L2	RPL6	23.5403			32.5738		9.03354		0.00190824
	4	Larvae L2	RPL6	23.9112			31.8566		7.94536		0.00405703
	1	Larvae L3	RPL6	25.0378			33.2975		8.2597		0.00326275	0.0047926					0.00154575	0.000772873
	2	Larvae L3	RPL6	24.5319			32.6259		8.09393		0.00366002
	3	Larvae L3	RPL6	25.4207			32.7683		7.34763		0.00613964
	4	Larvae L3	RPL6	25.8711			33.2262		7.35508		0.006108
	1	Pupa	RPL6	24.2747			32.4724		8.19773		0.00340595	0.00370979					0.00153348	0.000766738
	2	Pupa	RPL6	23.5324			30.9374		7.405		0.00590029
	3	Pupa	RPL6	23.37			32.1167		8.74662		0.00232811
	4	Pupa	RPL6	24.1348			32.4203		8.28555		0.0032048
	1	Female Fed Midgut	RPL6	25.4551			32.3706		6.91555		0.00828344	0.0183513					0.0153663	0.00768315
	2	Female Fed Midgut	RPL6	23.384			28.03		4.64602		0.03994
	3	Female Fed Midgut	RPL6	27.6208			33.3619		5.74104		0.0186971
	4	Female Fed Midgut	RPL6	23.7923			31.0611		7.26875		0.00648469
	1	Female Fed Fatbody	RPL6	21.9278			28.6338		6.70607		0.00957791	0.00757938					0.00395572	0.00197786
	2	Female Fed Fatbody	RPL6	23.9172			30.2804		6.36321		0.0121474
	3	Female Fed Fatbody	RPL6	21.6565			29.702		8.04551		0.00378496
	4	Female Fed Fatbody	RPL6	22.3714			30.0719		7.70057		0.00480724

## Sheet: Ityp-CE21
		Ityp-CE21
	Biological Replicate	Tissue	Reference Gene	Cт		Target Gene	Cт		Δct		2^(-Δct)	Average 2^(-Δct)					STDEV	SE
	1	Female Emerged Midgut	RPL6	18.4817		Ityp-CE21	31.3113		12.8296		0.000137372	0.000193892					0.000161878	8.09392e-05
	2	Female Emerged Midgut	RPL6	13.5537		Ityp-CE21	30.2742		16.7205		9.26042e-06
	3	Female Emerged Midgut	RPL6	17.3096		Ityp-CE21	28.6237		11.3141		0.000392741
	4	Female Emerged Midgut	RPL6	16.0675		Ityp-CE21	28.1152		12.0477		0.000236193
	1	Female Emerged Fatbody	RPL6	19.1559		Ityp-CE21	27.3435		8.1876		0.00342995	0.00173533					0.0012453	0.000622651
	2	Female Emerged Fatbody	RPL6	17.5544		Ityp-CE21	26.9077		9.35331		0.00152888
	3	Female Emerged Fatbody	RPL6	17.7191		Ityp-CE21	27.05		9.33093		0.00155278
	4	Female Emerged Fatbody	RPL6	16.6406		Ityp-CE21	27.8249		11.1843		0.000429715
	1	Male Emerged Midgut	RPL6	18.3247		Ityp-CE21	28.3795		10.0547		0.000940201	0.00228505					0.00165525	0.000827625
	2	Male Emerged Midgut	RPL6	19.6946		Ityp-CE21	27.5117		7.81709		0.00443425
	3	Male Emerged Midgut	RPL6	21.0182		Ityp-CE21	29.53		8.51176		0.00273972
	4	Male Emerged Midgut	RPL6	19.409		Ityp-CE21	29.3377		9.92872		0.00102603
	1	Male Emerged Fatbody	RPL6	19.7543		Ityp-CE21	26.8172		7.06285		0.00747948	0.0121937					0.00575399	0.00287699
	2	Male Emerged Fatbody	RPL6	20.1224		Ityp-CE21	25.9505		5.82803		0.0176031
	3	Male Emerged Fatbody	RPL6	18.5012		Ityp-CE21	25.6662		7.1651		0.00696772
	4	Male Emerged Fatbody	RPL6	21.3514		Ityp-CE21	27.2532		5.90189		0.0167246
	1	Male Fed Midgut	RPL6	20.4283		Ityp-CE21	31.847		11.4187		0.000365286	0.00112709					0.000740704	0.000370352
	2	Male Fed Midgut	RPL6	21.3559		Ityp-CE21	31.1445		9.78861		0.00113066
	3	Male Fed Midgut	RPL6	21.0552		Ityp-CE21	31.2014		10.1462		0.000882459
	4	Male Fed Midgut	RPL6	21.0662		Ityp-CE21	29.9412		8.87497		0.00212995
	1	Male Fed Fatbody	RPL6	20.1045		Ityp-CE21	26.7545		6.65002		0.00995735	0.00958549					0.000960252	0.000480126
	2	Male Fed Fatbody	RPL6	20.7675		Ityp-CE21	27.3152		6.54774		0.0106889
	3	Male Fed Fatbody	RPL6	20.3581		Ityp-CE21	27.1145		6.75644		0.00924931
	4	Male Fed Fatbody	RPL6	21.7191		Ityp-CE21	28.6066		6.88744		0.00844642
	1	Male Immature Midgut	RPL6	20.5765		Ityp-CE21	29.3697		8.79322		0.00225412	0.00227287					0.000229781	0.000114891
	2	Male Immature Midgut	RPL6	23.5113		Ityp-CE21	32.5097		8.99832		0.00195541
	3	Male Immature Midgut	RPL6	23.5951		Ityp-CE21	32.262		8.66699		0.00246024
	4	Male Immature Midgut	RPL6	23.766		Ityp-CE21	32.4557		8.68975		0.00242172
	1	Male Immature Fatbody	RPL6	19.4101		Ityp-CE21	28.0021		8.59195		0.00259159	0.00305001					0.00141552	0.000707759
	2	Male Immature Fatbody	RPL6	18.6452		Ityp-CE21	27.8152		9.16998		0.00173604
	3	Male Immature Fatbody	RPL6	19.3703		Ityp-CE21	27.8418		8.47145		0.00281733
	4	Male Immature Fatbody	RPL6	19.786		Ityp-CE21	27.414		7.62805		0.00505507
	1	Female Immature Midgut	RPL6	21.0355		Ityp-CE21	33.469		12.4335		0.000180781	0.000350009					0.000378534	0.000189267
	2	Female Immature Midgut	RPL6	21.8466		Ityp-CE21	34.8108		12.9642		0.000125139
	3	Female Immature Midgut	RPL6	20.9942		Ityp-CE21	33.4533		12.4591		0.000177597
	4	Female Immature Midgut	RPL6	21.6709		Ityp-CE21	31.7624		10.0915		0.000916518
	1	Female Immature Fatbody	RPL6	22.1607		Ityp-CE21	27.2179		5.05718		0.0300356	0.0197941					0.00867927	0.00433963
	2	Female Immature Fatbody	RPL6	21.0936		Ityp-CE21	26.8142		5.72067		0.018963
	3	Female Immature Fatbody	RPL6	21.7769		Ityp-CE21	28.5858		6.80888		0.00891915
	4	Female Immature Fatbody	RPL6	21.2942		Ityp-CE21	26.85		5.55582		0.0212585
	1	Larvae L1	RPL6	21.3199		Ityp-CE21	28.9955		7.67558		0.00489124	0.00398411					0.00114133	0.000570665
	2	Larvae L1	RPL6	20.5124		Ityp-CE21	28.177		7.66467		0.00492839
	3	Larvae L1	RPL6	20.2477		Ityp-CE21	28.3864		8.13875		0.00354807
	4	Larvae L1	RPL6	20.2831		Ityp-CE21	28.8878		8.60472		0.00256875
	1	Larvae L2	RPL6	22.0214		Ityp-CE21	30.6996		8.67817		0.00244124	0.00377006					0.00462228	0.00231114
	2	Larvae L2	RPL6	20.0477		Ityp-CE21	30.7919		10.7442		0.000582994
	3	Larvae L2	RPL6	22.0676		Ityp-CE21	28.6261		6.55853		0.0106093
	4	Larvae L2	RPL6	23.0322		Ityp-CE21	32.4652		9.43302		0.0014467
	1	Larvae L3	RPL6	24.6193		Ityp-CE21	31.6027		6.98334		0.00790322	0.00517124					0.00205787	0.00102894
	2	Larvae L3	RPL6	23.2769		Ityp-CE21	31.2785		8.00161		0.00390189
	3	Larvae L3	RPL6	24.1084		Ityp-CE21	31.5962		7.48778		0.00557126
	4	Larvae L3	RPL6	24.1443		Ityp-CE21	32.3838		8.23957		0.00330858
	1	Pupa	RPL6	22.7742		Ityp-CE21	27.2091		4.43484		0.0462361	0.070139					0.072048	0.036024
	2	Pupa	RPL6	21.9424		Ityp-CE21	24.4591		2.51661		0.174753
	3	Pupa	RPL6	20.9529		Ityp-CE21	27.6287		6.67574		0.00978144
	4	Pupa	RPL6	21.2046		Ityp-CE21	25.5328		4.32813		0.0497854
	1	Female Fed Midgut	RPL6	23.6807		Ityp-CE21	32.9498		9.26913		0.00162074	0.00168551					0.000944313	0.000422309
	2	Female Fed Midgut	RPL6	22.3182		Ityp-CE21	30.7305		8.41233		0.00293519
	3	Female Fed Midgut	RPL6	21.9508		Ityp-CE21	32.973		11.0222		0.00048083
	4	Female Fed Midgut	RPL6	23.8866		Ityp-CE21	32.7021		8.81549		0.00221959
	5	Female Fed Midgut	RPL6	25.3655		Ityp-CE21	35.1032		9.73779		0.00117121
	1	Female Fed Fatbody	RPL6	21.5394		Ityp-CE21	29.7011		8.16168		0.00349212	0.00479072					0.00257095	0.00128548
	2	Female Fed Fatbody	RPL6	22.8558		Ityp-CE21	29.734		6.87828		0.00850023
	3	Female Fed Fatbody	RPL6	19.9475		Ityp-CE21	27.7613		7.81379		0.00444441
	4	Female Fed Fatbody	RPL6	19.8335		Ityp-CE21	28.3524		8.51894		0.0027261

## Sheet: Ityp-LIP1
		Ityp-LIP1
	Biological Replicate	Tissue	Reference Gene	Cт		Target Gene	Cт		Δct		2^(-Δct)	Average 2^(-Δct)					STDEV	SE
	1	Female Emerged Midgut	RPL6	19.9222908		Ityp-LIP1	29.55507278		9.632781982		0.00125963199005558	0.00135576					0.000717	0.000358599
	2	Female Emerged Midgut	RPL6	20.36951447		Ityp-LIP1	29.07450485		8.704990387		0.00239627568812859
	3	Female Emerged Midgut	RPL6	19.1083107		Ityp-LIP1	29.33905411		10.23074341		0.00083222231406709
	4	Female Emerged Midgut	RPL6	18.78450012		Ityp-LIP1	28.8473835		10.06288338		0.00093491098059942
	1	Female Emerged Fatbody	RPL6	20.39411926		Ityp-LIP1	27.23931122		6.845191956		0.00869744908973027	0.011623392					0.002535	0.001463766
	2	Female Emerged Fatbody	RPL6	19.40697479		Ityp-LIP1	25.65359116		6.246616364		0.01316985832856580
	3	Female Emerged Fatbody	RPL6	19.35480881		Ityp-LIP1	25.6198349		6.265026093		0.01300287005831270
	1	Male Emerged Midgut	RPL6	21.00750351		Ityp-LIP1	30.88829422		9.88079071		0.00106068301705832	0.001967958					0.001995	0.000997537
	2	Male Emerged Midgut	RPL6	21.04353714		Ityp-LIP1	28.69926262		7.655725479		0.00495903293023990
	3	Male Emerged Midgut	RPL6	21.67980194		Ityp-LIP1	31.74198341		10.06218147		0.00093536594694666
	4	Male Emerged Midgut	RPL6	21.88676453		Ityp-LIP1	31.97795105		10.09118652		0.00091674840832868
	1	Male Emerged Fatbody	RPL6	22.04221725		Ityp-LIP1	28.60599518		6.563777924		0.01057075385334390	0.010641177					0.004316	0.002157882
	2	Male Emerged Fatbody	RPL6	21.55231857		Ityp-LIP1	28.83265114		7.280332565		0.00643282177859394
	3	Male Emerged Fatbody	RPL6	20.59936523		Ityp-LIP1	27.39969826		6.800333023		0.00897213458561764
	4	Male Emerged Fatbody	RPL6	23.4011631		Ityp-LIP1	29.31479263		5.913629532		0.01658899696399710
	1	Male Fed Midgut	RPL6	16.77742767		Ityp-LIP1	31.45212173		14.67469406		0.00003823639244130	0.000518937					0.00058	0.000289815
	2	Male Fed Midgut	RPL6	18.3134079		Ityp-LIP1	30.76857948		12.45517159		0.00017808188816490
	3	Male Fed Midgut	RPL6	21.92862511		Ityp-LIP1	31.48114204		9.552516937		0.00133169836886313
	4	Male Fed Midgut	RPL6	20.76553345		Ityp-LIP1	31.65344238		10.88790894		0.00052773126012449
	1	Male Fed Fatbody	RPL6	21.79050255		Ityp-LIP1	30.96905136		9.178548813		0.00172576433950726	0.003432743					0.001813	0.000906673
	2	Male Fed Fatbody	RPL6	21.85221863		Ityp-LIP1	30.32203865		8.469820023		0.00282052605104991
	3	Male Fed Fatbody	RPL6	21.84508133		Ityp-LIP1	30.133564		8.288482666		0.00319829190597976
	4	Male Fed Fatbody	RPL6	23.6360054		Ityp-LIP1	31.02010345		7.384098053		0.00598638983987789
	1	Male Immature Midgut	RPL6	26.58324814		Ityp-LIP1	40		13.41675186		0.00009144400638108	9.69244E-05					2.7E-05	1.35092E-05
	2	Male Immature Midgut	RPL6	27.13095284		Ityp-LIP1	40		12.86904716		0.00013366902730375
	3	Male Immature Midgut	RPL6	26.16904068		Ityp-LIP1	40		13.83095932		0.00006862247471440
	4	Male Immature Midgut	RPL6	26.62244034		Ityp-LIP1	40		13.37755966		0.00009396222084406
	1	Male Immature Fatbody	RPL6	22.17807961		Ityp-LIP1	31.58400345		9.405923843		0.00147412661114742	0.002831251					0.001687	0.000843422
	2	Male Immature Fatbody	RPL6	22.49285889		Ityp-LIP1	31.07292175		8.580062866		0.00261302588895480
	3	Male Immature Fatbody	RPL6	22.20664978		Ityp-LIP1	31.19070053		8.984050751		0.00197483693641599
	4	Male Immature Fatbody	RPL6	23.29722595		Ityp-LIP1	30.86712074		7.569894791		0.00526301495397491
	1	Female Immature Midgut	RPL6	25.80897522		Ityp-LIP1	36.0647583		10.25578308		0.00081790274091500	0.000747198					0.000131	7.59204E-05
	2	Female Immature Midgut	RPL6	26.27278519		Ityp-LIP1	36.98645782		10.71367264		0.00059547450524881
	3	Female Immature Midgut	RPL6	25.45412445		Ityp-LIP1	35.69182587		10.23770142		0.00082821823296325
	1	Female Immature Fatbody	RPL6	23.81815529		Ityp-LIP1	34.65201569		10.8338604		0.00054787697795823	0.00034097					0.000202	0.000101025
	2	Female Immature Fatbody	RPL6	22.23017502		Ityp-LIP1	35.33822632		13.1080513		0.00011326177774457
	3	Female Immature Fatbody	RPL6	23.67042351		Ityp-LIP1	35.73219299		12.06176949		0.00023390827388030
	4	Female Immature Fatbody	RPL6	23.63242722		Ityp-LIP1	34.69107056		11.05864334		0.00046883134830922
	1	Larvae L1	RPL6	23.79798508		Ityp-LIP1	35.29248428		11.49449921		0.00034658595040976	0.000416759					0.000162	8.07562E-05
	2	Larvae L1	RPL6	22.29965019		Ityp-LIP1	33.95491409		11.6552639		0.00031003873660795
	3	Larvae L1	RPL6	23.61296844		Ityp-LIP1	34.18400574		10.57103729		0.00065735608836760
	4	Larvae L1	RPL6	23.01833725		Ityp-LIP1	34.48616028		11.46782303		0.00035305411962046
	1	Larvae L2	RPL6	21.84909439		Ityp-LIP1	35.43405914		13.58496475		0.00008138008133113	0.000276631					0.000171	8.56164E-05
	2	Larvae L2	RPL6	23.76509094		Ityp-LIP1	36.02039337		12.25530243		0.00020454382020420
	3	Larvae L2	RPL6	24.19318771		Ityp-LIP1	35.22679901		11.0336113		0.00047703697119606
	4	Larvae L2	RPL6	24.05588722		Ityp-LIP1	35.56302261		11.50713539		0.00034356355116098
	1	Larvae L3	RPL6	24.93937874		Ityp-LIP1	40		15.06062126		0.00002926181410061	3.97389E-05					2.55E-05	1.27478E-05
	2	Larvae L3	RPL6	24.04823685		Ityp-LIP1	40		15.95176315		0.00001577759512241
	3	Larvae L3	RPL6	25.33940887		Ityp-LIP1	40		14.66059113		0.00003861200173768
	4	Larvae L3	RPL6	26.30309296		Ityp-LIP1	40		13.69690704		0.00007530436177299
	1	Pupa	RPL6	23.99931717		Ityp-LIP1	35.80400467		11.8046875		0.00027953421494917	0.000460062					0.000306	0.000152947
	2	Pupa	RPL6	23.71316147		Ityp-LIP1	33.83166122		10.11849976		0.00089955570533411
	3	Pupa	RPL6	22.75842667		Ityp-LIP1	33.92807007		11.1696434		0.00043411250383733
	4	Pupa	RPL6	23.58662224		Ityp-LIP1	35.69134521		12.10472298		0.00022704675267970
	1	Female Fed Midgut	RPL6	25.55563927		Ityp-LIP1	40		14.44436073		0.00004485533981653	6.20573E-05					7.82E-05	3.91075E-05
	2	Female Fed Midgut	RPL6	23.60953522		Ityp-LIP1	40		16.39046478		0.00001164068286265
	3	Female Fed Midgut	RPL6	27.53763199		Ityp-LIP1	40		12.46236801		0.00017719579501224
	4	Female Fed Midgut	RPL6	23.93011093		Ityp-LIP1	40		16.06988907		0.00001453722001489
	1	Female Fed Fatbody	RPL6	21.97312927		Ityp-LIP1	35.63567352		13.66254425		0.00007711952811654	0.000116085					4.74E-05	2.3706E-05
	2	Female Fed Fatbody	RPL6	23.92473221		Ityp-LIP1	36.41899872		12.49426651		0.00017332092839362
	3	Female Fed Fatbody	RPL6	21.75493622		Ityp-LIP1	35.41791916		13.66298294		0.00007709608141717
	4	Female Fed Fatbody	RPL6	22.55891609		Ityp-LIP1	35.39450836		12.83559227		0.00013680491942731

## Sheet: ANOVA
														Treatment letter	Treatment	Graph ANOVA letter
														A	Pupa	a
									Treatments	Tukey HSD	Tukey HSD	Tukey HSD		B	L3	b
									pair	Q statistic	p-value	inferfence		C	L2	a
	Ityp-CE10								A vs B	11.5219	0.0010053	** p<0.01		D	L1	a
	Treatment letter	Tissue - Whole body	Entry value						A vs C	2.2353	0.4258150	insignificant
	-	Treatment:	1) 2^(-Δct)	2) 2^(-Δct)	3) 2^(-Δct)	4) 2^(-Δct)			A vs D	1.6837	0.6330889	insignificant
	A	Pupa	0.00864198465397957	0.00631001958759768	0.00309885459003091	0.00642560537122856			B vs C	9.2866	0.0010053	** p<0.01
	B	L3	0.0855821103053423	0.0461001416337036	0.0796121556999011	0.0814135368848156			B vs D	9.8382	0.0010053	** p<0.01
	C	L2	0.0155515913410014	0.00842712794473946	0.0136689923535801	0.0388669505096244			C vs D	0.5516	0.8999947	insignificant
	D	L1	0.011030722715283	0.0176139355118837	0.0133078838305408	0.0217217564514994
	Treatment letter	Tissue - Female Midgut	Entry value
	-	Treatment:	1) 2^(-Δct)	2) 2^(-Δct)	3) 2^(-Δct)	4) 2^(-Δct)	5) 2^(-Δct)		Treatments	Tukey HSD	Tukey HSD	Tukey HSD		Treatment letter	Treatment	Graph ANOVA letter
	A	Fed	0.00633660397270442	0.00339939964898397	0.0098553386043322	0.0260817308865112	0.0152367131117146		pair	Q statistic	p-value	inferfence		A	Fed	a
	B	Emerged	0.00295756025340823	0.00250980607414456	0.00533061183040922	0.000958782813379716			A vs B	0.4291	0.8999947	insignificant		B	Emerged	a
	C	Immature	0.0114502675232456	0.0219865266269053	0.0218706201511966	0.182609895735296			A vs C	2.1960	0.3091685	insignificant		C	Immature	a
									B vs C	2.4904	0.2312608	insignificant
	Treatment letter	Tissue -Female Fatbody	Entry value
	-	Treatment:	1) 2^(-Δct)	2) 2^(-Δct)	3) 2^(-Δct)	4) 2^(-Δct)			Treatments	Tukey HSD	Tukey HSD	Tukey HSD		Treatment letter	Treatment	Graph ANOVA letter
	A	Fed	0.0167687524929846	0.016537821281936	0.00905011902149078	0.00434509248417711			pair	Q statistic	p-value	inferfence		A	Fed	ab
	B	Emerged	0.00637752536936345	0.00286484607072008	0.00386647664567563	0.00135224301433707			A vs B	2.0705	0.3518540	insignificant		B	Emerged	a
	C	Immature	0.00918492889547376	0.0114381634507373	0.035313204316015	0.0205416414787811			A vs C	1.9122	0.4049545	insignificant		C	Immature	b
									B vs C	3.9828	0.0479666	* p<0.05
	Treatment letter	Tissue - Male Midgut	Entry value
	-	Treatment:	1) 2^(-Δct)	2) 2^(-Δct)	3) 2^(-Δct)	4) 2^(-Δct)			Treatments	Tukey HSD	Tukey HSD	Tukey HSD		Treatment letter	Treatment	Graph ANOVA letter
	A	Fed	0.0150406344156934	0.0360101139430804	0.0607731364554085	0.0282173434906588			pair	Q statistic	p-value	inferfence		A	Fed	a
	B	Emerged	0.00313228830508425	0.00493919430456862	0.00371363006272852	0.00166453925309127			A vs B	3.3969	0.0913111	insignificant		B	Emerged	a
	C	Immature	0.0014842291063875	0.0450083557093769	0.0546807404747639	0.0569271655145248			A vs C	0.4846	0.8999947	insignificant		C	Immature	a
									B vs C	3.8815	0.0536433	insignificant
	Treatment letter	Tissue - Male Fatbody	Entry value
	-	Treatment:	1) 2^(-Δct)	2) 2^(-Δct)	3) 2^(-Δct)	4) 2^(-Δct)			Treatments	Tukey HSD	Tukey HSD	Tukey HSD		Treatment letter	Treatment	Graph ANOVA letter
	A	Fed	0.00582400451015898	0.0372070165113619	0.0662260154565482	0.0753891221473086			pair	Q statistic	p-value	inferfence		A	Fed	ab
	B	Emerged	0.00309674539795872	0.0161498721001507	0.00404685749130639	0.0104613660172145			A vs B	3.1739	0.1162690	insignificant		B	Emerged	a
	C	Immature	0.056433642439863	0.0354946731187563	0.0952269296555305	0.0472093605198731			A vs C	1.0458	0.7358030	insignificant		C	Immature	b
									B vs C	4.2197	0.0369272	* p<0.05
	Ityp-CE9								Treatments	Tukey HSD	Tukey HSD	Tukey HSD
	Treatment letter	Tissue - Whole body	Entry value						pair	Q statistic	p-value	inferfence		Treatment letter	Treatment	Graph ANOVA letter
	-	Treatment:	1) 2^(-Δct)	2) 2^(-Δct)	3) 2^(-Δct)	4) 2^(-Δct)			A vs B	4.4786	0.0354657	* p<0.05		A	Pupa	a
	A	Pupa	0.00230568991059324	0.00608553090995352	0.00529829189277015	0.00649261357033044			A vs C	3.1247	0.1757768	insignificant		B	L3	b
	B	L3	0.294265710294358	0.0836971245175448	0.252629453931632	0.111095047488554			A vs D	3.4412	0.1233116	insignificant		C	L2	ab
	C	L2	0.0871969248070465	0.0564434917418291	0.071920035172158	0.308013083238186			B vs C	1.3539	0.7574173	insignificant		D	L1	ab
	D	L1	0.0982845594684708	0.169194682639817	0.139313076613524	0.167766458789065			B vs D	1.0374	0.8767087	insignificant
									C vs D	0.3165	0.8999947	insignificant
	Treatment letter	Tissue - Female Midgut	Entry value
	-	Treatment:	1) 2^(-Δct)	2) 2^(-Δct)	3) 2^(-Δct)	4) 2^(-Δct)	5) 2^(-Δct)		Treatments	Tukey HSD	Tukey HSD	Tukey HSD
	A	Fed	0.0888323428467042	0.0353297819651155	0.0593112636961749	0.130022161900725	0.0736436927281905		pair	Q statistic	p-value	inferfence		Treatment letter	Treatment	Graph ANOVA letter
	B	Emerged	0.0331844863967954	0.013406421357911	0.0210627223116419	0.00441221930213496			A vs B	1.3934	0.5998389	insignificant		A	Fed	a
	C	Immature	0.0178345755825091	0.0584153982713933	0.0873082417040405	0.366289897311585			A vs C	1.2908	0.6402170	insignificant		B	Emerged	a
									B vs C	2.5465	0.2183726	insignificant		C	Immature	a
	Treatment letter	Tissue -Female Fatbody	Entry value
	-	Treatment:	1) 2^(-Δct)	2) 2^(-Δct)	3) 2^(-Δct)	4) 2^(-Δct)			Treatments	Tukey HSD	Tukey HSD	Tukey HSD		Treatment letter	Treatment	Graph ANOVA letter
	A	Fed	0.0943422321846519	0.118201410204226	0.0789426300357238	0.0545680091082221			pair	Q statistic	p-value	inferfence		A	Fed	a
	B	Emerged	0.0383779391022879	0.0215230252933336	0.0174972372056342	0.00714183293420522			A vs B	1.5350	0.5459659	insignificant		B	Emerged	a
	C	Immature	0.106422401090354	0.146738314101605	0.402941022203302	0.0979865414191964			A vs C	2.3950	0.2593332	insignificant		C	Immature	a
									B vs C	3.9300	0.0508464	insignificant
	Treatment letter	Tissue - Male Midgut	Entry value
	-	Treatment:	1) 2^(-Δct)	2) 2^(-Δct)	3) 2^(-Δct)	4) 2^(-Δct)			Treatments	Tukey HSD	Tukey HSD	Tukey HSD		Treatment letter	Treatment	Graph ANOVA letter
	A	Fed	0.0245850148134963	0.0536188088550125	0.143560796142671	0.045821480789266			pair	Q statistic	p-value	inferfence		A	Fed	a
	B	Emerged	0.0151343240174446	0.0180468815040124	0.0560815444629972	0.0132622530330498			A vs B	2.4182	0.2535172	insignificant		B	Emerged	a
	C	Immature	0.00901707256691888	0.0140956581671443	0.0489534516914218	0.0225528454544453			A vs C	2.5340	0.2261625	insignificant		C	Immature	a
									B vs C	0.1158	0.8999947	insignificant
	Treatment letter	Tissue - Male Fatbody	Entry value
	-	Treatment:	1) 2^(-Δct)	2) 2^(-Δct)	3) 2^(-Δct)	4) 2^(-Δct)			Treatments	Tukey HSD	Tukey HSD	Tukey HSD		Treatment letter	Treatment	Graph ANOVA letter
	A	Fed	0.0524930427146241	0.20353302499417	0.532413862677953	0.682889566667952			pair	Q statistic	p-value	inferfence		A	Fed	a
	B	Emerged	0.0251583894656711	0.15974870198159	0.0272811911257113	0.0507901034661914			A vs B	3.4143	0.0895855	insignificant		B	Emerged	a
	C	Immature	0.11789769782745	0.114692962020637	0.236112335092091	0.254667988245203			A vs C	2.1134	0.3383056	insignificant		C	Immature	a
									B vs C	1.3009	0.6368095	insignificant
									Treatments	Tukey HSD	Tukey HSD	Tukey HSD
									pair	Q statistic	p-value	inferfence		Treatment letter	Treatment	Graph ANOVA letter
	Ityp-CE15								A vs B	3.6692	0.0987888	insignificant		A	Pupa	a
	Treatment letter	Tissue - Whole body	Entry value						A vs C	0.1360	0.8999947	insignificant		B	L3	a
	-	Treatment:	1) 2^(-Δct)	2) 2^(-Δct)	3) 2^(-Δct)	4) 2^(-Δct)			A vs D	0.1405	0.8999947	insignificant		C	L2	a
	A	Pupa	0.000692874126970519	0.000320648444571576	0.000606435211533909	0.00337515015982987			B vs C	3.7951	0.0855952	insignificant		D	L1	a
	B	L3	0.0109175565034538		0.0131106186852467	0.0814016979324799			B vs D	3.7993	0.0851908	insignificant
	C	L2	0.0000378414165939111	0.0000581621044214355	0.0000329445912711532	0.00021272189868156			C vs D	0.0045	0.8999947	insignificant
	D	L1	0.0000182264539763813	0.0000416986251998156	0.0000380147128599301	0.0000909595354477434
	Treatment letter	Tissue - Female Midgut	Entry value						Treatments	Tukey HSD	Tukey HSD	Tukey HSD
	-	Treatment:	1) 2^(-Δct)	2) 2^(-Δct)	3) 2^(-Δct)	4) 2^(-Δct)	5) 2^(-Δct)		pair	Q statistic	p-value	inferfence		Treatment letter	Treatment	Graph ANOVA letter
	A	Fed	0.0197286660952361	0.0111317351254185	0.000102739453387163	0.000494928712870832	0.00866361699661315		A vs B	1.1145	0.7095689	insignificant		A	Fed	a
	B	Emerged	0.0349477776813097	0.000264455145929956	0.0127067285088125	0.00718172318235459			A vs C	4.4231	0.0264312	* p<0.05		B	Emerged	ab
	C	Immature	0.0228889724632072	0.0240098157504356	0.0349364596508534	0.0415577832802091			B vs C	3.1388	0.1155921	insignificant		C	Immature	b
	Treatment letter	Tissue -Female Fatbody	Entry value
	-	Treatment:	A 2^(-Δct)	B 2^(-Δct)	C 2^(-Δct)	D 2^(-Δct)			Treatments	Tukey HSD	Tukey HSD	Tukey HSD		Treatment letter	Treatment	Graph ANOVA letter
	A	Fed	0.020997662275796	0.0306034304408909	0.0130768970550378	0.00714217285526023			pair	Q statistic	p-value	inferfence		A	Fed	a
	B	Emerged	0.109220602467171	0.0609981204661888	0.0525873720945393	0.0788404156794741			A vs B	7.1638	0.0017399	** p<0.01		B	Emerged	b
	C	Immature	0.0102799905055791	0.0122706197644925	0.020446404127956	0.00507619786283812			A vs C	0.7402	0.8543952	insignificant		C	Immature	a
									B vs C	7.9040	0.0010053	** p<0.01
	Treatment letter	Tissue - Male Midgut	Entry value
	-	Treatment:	1) 2^(-Δct)	2) 2^(-Δct)	3) 2^(-Δct)	4) 2^(-Δct)			Treatments	Tukey HSD	Tukey HSD	Tukey HSD		Treatment letter	Treatment	Graph ANOVA letter
	A	Fed	0.000355552165049644	0.000861687446020063	0.000915022921926765	0.00244660505633622			pair	Q statistic	p-value	inferfence		A	Fed	a
	B	Emerged	0.015910647933228	0.0220566042649552	0.0214831683083783	0.0204031182838541			A vs B	4.6940	0.0219440	* p<0.05		B	Emerged	b
	C	Immature	0.000665591306057767	0.0282233502988702	0.00143341002851976	0.00114099055416221			A vs C	1.6765	0.4912717	insignificant		C	Immature	ab
									B vs C	3.0175	0.1373066	insignificant
	Treatment letter	Tissue - Male Fatbody	Entry value
	-	Treatment:	1) 2^(-Δct)	2) 2^(-Δct)	3) 2^(-Δct)	4) 2^(-Δct)			Treatments	Tukey HSD	Tukey HSD	Tukey HSD		Treatment letter	Treatment	Graph ANOVA letter
	A	Fed	0.0182487302614538	0.125280262747019	0.132979111208969	0.195856526659839			pair	Q statistic	p-value	inferfence		A	Fed	a
	B	Emerged	0.041905033731825	0.195393836312494	0.0412557686243769	0.23528158724948			A vs B	0.2854	0.8999947	insignificant		B	Emerged	a
	C	Immature	0.0228889724632072	0.0240098157504356	0.0349364596508534	0.0415577832802091			A vs C	2.4013	0.2577352	insignificant		C	Immature	a
									B vs C	2.6867	0.1938342	insignificant
									Treatments	Tukey HSD	Tukey HSD	Tukey HSD
	Ityp-CE21								pair	Q statistic	p-value	inferfence		Treatment letter	Treatment	Graph ANOVA letter
	Treatment letter	Tissue - Whole body	Entry value						A vs B	3.5976	0.1027942	insignificant		A	Pupa	a
	-	Treatment:	1) 2^(-Δct)	2) 2^(-Δct)	3) 2^(-Δct)	4) 2^(-Δct)			A vs C	3.6752	0.0938060	insignificant		B	L3	a
	A	Pupa	0.0462360723214877	0.174752972498657	0.00978144022227659	0.0497853631288547			A vs D	3.6633	0.0951326	insignificant		C	L2	a
	B	L3	0.00790322324082145	0.00390189372038495	0.00557126394658972	0.00330857907334156			B vs C	0.0776	0.8999947	insignificant		D	L1	a
	C	L2	0.00244123506747789	0.000582994433781069	0.0106092979878766	0.00144670268534742			B vs D	0.0657	0.8999947	insignificant
	D	L1	0.00489124387632164	0.00492838597569351	0.0035480740402341	0.00256875435974977			C vs D	0.0119	0.8999947	insignificant
	Treatment letter	Tissue - Female Midgut	Entry value						Treatments	Tukey HSD	Tukey HSD	Tukey HSD
	-	Treatment:	1) 2^(-Δct)	2) 2^(-Δct)	3) 2^(-Δct)	4) 2^(-Δct)	5) 2^(-Δct)		pair	Q statistic	p-value	inferfence		Treatment letter	Treatment	Graph ANOVA letter
	A	Fed	0.00162073673277538	0.0029351933977078	0.000480829729572643	0.00221959054419341	0.00117120932499685		A vs B	4.9259	0.0147729	* p<0.05		A	Fed	a
	B	Emerged	0.000137372384972445	9.26042312136982E-06	0.000392741401216243	0.000236193232484095			A vs C	4.4103	0.0268246	* p<0.05		B	Emerged	b
	C	Immature	0.000180780704364849	0.000125139078622498	0.000177596607955559	0.000916518155611442			B vs C	0.4891	0.8999947	insignificant		C	Immature	b
	Treatment letter	Tissue -Female Fatbody	Entry value
	-	Treatment:	1) 2^(-Δct)	2) 2^(-Δct)	3) 2^(-Δct)	4) 2^(-Δct)			Treatments	Tukey HSD	Tukey HSD	Tukey HSD		Treatment letter	Treatment	Graph ANOVA letter
	A	Fed	0.00349211762904755	0.00850022917108075	0.00444441337983011	0.00272610380441093			pair	Q statistic	p-value	inferfence		A	Fed	a
	B	Emerged	0.00342995326074904	0.00152887540383294	0.0015527760380551	0.000429714535446505			A vs B	1.1583	0.6921265	insignificant		B	Emerged	a
	C	Immature	0.0300356479101381	0.0189630023178388	0.00891915069653433	0.0212584961025546			A vs C	5.6880	0.0075736	** p<0.01		C	Immature	b
									B vs C	6.8464	0.0023579	** p<0.01
	Treatment letter	Tissue - Male Midgut	Entry value
	-	Treatment:	1) 2^(-Δct)	2) 2^(-Δct)	3) 2^(-Δct)	4) 2^(-Δct)			Treatments	Tukey HSD	Tukey HSD	Tukey HSD		Treatment letter	Treatment	Graph ANOVA letter
	A	Fed	0.00036528600117148	0.00113066380015033	0.000882459070260055	0.00212994860182695			pair	Q statistic	p-value	inferfence		A	Fed	a
	B	Emerged	0.00094020122904099	0.00443425392955498	0.00273971796942069	0.00102602623832662			A vs B	2.1945	0.3139127	insignificant		B	Emerged	a
	C	Immature	0.00225411913126572	0.00195540639143303	0.00246023788503173	0.00242172259083022			A vs C	2.1714	0.3206855	insignificant		C	Immature	a
									B vs C	0.0231	0.8999947	insignificant
	Treatment letter	Tissue - Male Fatbody	Entry value
	-	Treatment:	1) 2^(-Δct)	2) 2^(-Δct)	3) 2^(-Δct)	4) 2^(-Δct)			Treatments	Tukey HSD	Tukey HSD	Tukey HSD		Treatment letter	Treatment	Graph ANOVA letter
	A	Fed	0.00995734956043415	0.010688885527032	0.00924930571296918	0.00844642441991885			pair	Q statistic	p-value	inferfence		A	Fed	ab
	B	Emerged	0.00747947572232734	0.0176030871519128	0.00696771731665721	0.0167245825752709			A vs B	1.5051	0.5575451	insignificant		B	Emerged	a
	C	Immature	0.00259158519597381	0.00173603913111873	0.00281733215724189	0.00505506842162347			A vs C	3.7715	0.0605636	insignificant		C	Immature	b
									B vs C	5.2766	0.0116999	* p<0.05
									Treatments	Tukey HSD	Tukey HSD	Tukey HSD
									pair	Q statistic	p-value	inferfence		Treatment letter	Treatment	Graph ANOVA letter
	Ityp-CE13								A vs B	7.4331	0.0010053	** p<0.01		A	Pupa	a
	Treatment letter	Tissue - Whole body	Entry value						A vs C	5.2836	0.0130926	* p<0.05		B	L3	b
	-	Treatment:	1) 2^(-Δct)	2) 2^(-Δct)	3) 2^(-Δct)	4) 2^(-Δct)			A vs D	3.3065	0.143583	insignificant		C	L2	b
	A	Pupa	0.000705707	0.000754418	0.00056835	0.00068956			B vs C	2.1494	0.457652	insignificant		D	L1	ab
	B	L3	0.0262257	0.0284803	0.0663169	0.0437443			B vs D	4.1266	0.0546339	insignificant
	C	L2	0.035455	0.0321522	0.0261247	0.0241752			C vs D	1.9771	0.522507	insignificant
	D	L1	0.01845	0.0169139	0.0322681	0.00717142
	Treatment letter	Tissue - Female Midgut	Entry value						Treatments	Tukey HSD	Tukey HSD	Tukey HSD
	-	Treatment:	1) 2^(-Δct)	2) 2^(-Δct)	3) 2^(-Δct)	4) 2^(-Δct)			pair	Q statistic	p-value	inferfence		Treatment letter	Treatment	Graph ANOVA letter
	A	Fed	0.00854895	0.0134892	0.0281906	0.0610554			A vs B	0.8	0.831178	insignificant		A	Fed	a
	B	Emerged	0.00613516	0.0172287	0.0269111	0.00965297			A vs C	5.6533	0.0078544	** p<0.01		B	Emerged	a
	C	Immature	0.112793	0.0844551	0.0867644	0.190177			B vs C	6.4533	00:04:59.704000	** p<0.01		C	Immature	b
	Treatment letter	Tissue -Female Fatbody	Entry value
	-	Treatment:	A 2^(-Δct)	B 2^(-Δct)	C 2^(-Δct)	D 2^(-Δct)			Treatments	Tukey HSD	Tukey HSD	Tukey HSD		Treatment letter	Treatment	Graph ANOVA letter
	A	Fed	0.00865812	0.0333243	0.0215827	0.0115771			pair	Q statistic	p-value	inferfence		A	Fed	a
	B	Emerged	0.00551591	0.0054354	0.00531179	0.00478389			A vs B	3.8573	0.0550943	insignificant		B	Emerged	a
	C	Immature	0.0469342	0.038964	0.0381316	0.0466656			A vs C	6.8134	0.002435	** p<0.01		C	Immature	b
									B vs C	10.6707	0.0010053	** p<0.01
	Treatment letter	Tissue - Male Midgut	Entry value
	-	Treatment:	1) 2^(-Δct)	2) 2^(-Δct)	3) 2^(-Δct)	4) 2^(-Δct)			Treatments	Tukey HSD	Tukey HSD	Tukey HSD		Treatment letter	Treatment	Graph ANOVA letter
	A	Fed	0.0227543	0.0119256	0.00333262	0.0028192			pair	Q statistic	p-value	inferfence		A	Fed	a
	B	Emerged	0.00950774	0.0141687	0.0147589				A vs B	0.3025	0.899995	insignificant		B	Emerged	a
	C	Immature	0.0953822	0.137589	0.112853	0.0815292			A vs C	12.1253	0.0010053	** p<0.01		C	Immature	b
									B vs C	10.9233	0.0010053	** p<0.01
	Treatment letter	Tissue - Male Fatbody	Entry value
	-	Treatment:	1) 2^(-Δct)	2) 2^(-Δct)	3) 2^(-Δct)	4) 2^(-Δct)			Treatments	Tukey HSD	Tukey HSD	Tukey HSD		Treatment letter	Treatment	Graph ANOVA letter
	A	Fed	0.0226043	0.0415588	0.0668485	0.133054			pair	Q statistic	p-value	inferfence		A	Fed	a
	B	Emerged	0.00168578	0.00161707	0.000203691	0.00179697			A vs B	4.0001	0.0470555	* p<0.05		B	Emerged	b
	C	Immature	0.0808201	0.111131	0.145301	0.0906724			A vs C	2.5331	0.226376	insignificant		C	Immature	a
									B vs C	6.5332	0.0032047	** p<0.01
									Treatments	Tukey HSD	Tukey HSD	Tukey HSD
									pair	Q statistic	p-value	inferfence		Treatment letter	Treatment	Graph ANOVA letter
	Ityp-CE16								A vs B	12.0526	0.0010053	** p<0.01		A	Pupa	a
	Treatment letter	Tissue - Whole body	Entry value						A vs C	3.8444	0.0768364	insignificant		B	L3	b
	-	Treatment:	1) 2^(-Δct)	2) 2^(-Δct)	3) 2^(-Δct)	4) 2^(-Δct)			A vs D	2.4684	0.344438	insignificant		C	L2	a
	A	Pupa	0.00791431	0.0112528	0.00869793	0.0137877			B vs C	8.2083	0.0010053	** p<0.01		D	L1	a
	B	L3	0.262674	0.155461	0.186188	0.253963			B vs D	9.5842	0.0010053	** p<0.01
	C	L2	0.029852	0.0703766	0.115633	0.0862678			C vs D	1.3759	0.749113	insignificant
	D	L1	0.0884114	0.0416317	0.0390357	0.0398236
	Treatment letter	Tissue - Female Midgut	Entry value						Treatments	Tukey HSD	Tukey HSD	Tukey HSD
	-	Treatment:	1) 2^(-Δct)	2) 2^(-Δct)	3) 2^(-Δct)	4) 2^(-Δct)			pair	Q statistic	p-value	inferfence		Treatment letter	Treatment	Graph ANOVA letter
	A	Fed	0.129419	0.194757	0.867017	0.74185			A vs B	1.7427	0.466359	insignificant		A	Fed	ab
	B	Emerged	0.0801539	0.108594	0.106774	0.0323868			A vs C	2.2696	0.292546	insignificant		B	Emerged	a
	C	Immature	0.848679	0.457301	0.685072	2.03241			B vs C	4.0124	0.0464241	* p<0.05		C	Immature	b
	Treatment letter	Tissue -Female Fatbody	Entry value
	-	Treatment:	A 2^(-Δct)	B 2^(-Δct)	C 2^(-Δct)	D 2^(-Δct)			Treatments	Tukey HSD	Tukey HSD	Tukey HSD		Treatment letter	Treatment	Graph ANOVA letter
	A	Fed	0.00140157	0.018816	0.00189359	0.00264517			pair	Q statistic	p-value	inferfence		A	Fed	ab
	B	Emerged	0.00115991	0.00193038	0.00206638	0.000737873			A vs B	1.7151	0.476713	insignificant		B	Emerged	a
	C	Immature	0.0101707	0.00765825	0.0171801	0.0151069			A vs C	2.3059	0.282618	insignificant		C	Immature	b
									B vs C	4.021	0.0459843	* p<0.05
	Treatment letter	Tissue - Male Midgut	Entry value
	-	Treatment:	1) 2^(-Δct)	2) 2^(-Δct)	3) 2^(-Δct)	4) 2^(-Δct)			Treatments	Tukey HSD	Tukey HSD	Tukey HSD		Treatment letter	Treatment	Graph ANOVA letter
	A	Fed	0.576531	0.239067	0.251348	0.150626			pair	Q statistic	p-value	inferfence		A	Fed	a
	B	Emerged	0.33593	0.364933	0.980425	0.437505			A vs B	1.7438	0.465983	insignificant		B	Emerged	ab
	C	Immature	1.33447	0.912031	1.17174	0.72457			A vs C	5.66	0.0077997	** p<0.01		C	Immature	b
									B vs C	3.9162	01:14:20.244000	insignificant
	Treatment letter	Tissue - Male Fatbody	Entry value
	-	Treatment:	1) 2^(-Δct)	2) 2^(-Δct)	3) 2^(-Δct)	4) 2^(-Δct)			Treatments	Tukey HSD	Tukey HSD	Tukey HSD		Treatment letter	Treatment	Graph ANOVA letter
	A	Fed	0.00522118	0.00676527	0.0338258	0.0291301			pair	Q statistic	p-value	inferfence		A	Fed	a
	B	Emerged	0.00438422	0.00993594	0.00118526	0.00762669			A vs B	2.0442	0.360362	insignificant		B	Emerged	a
	C	Immature	0.0279352	0.0655521	0.0413488	0.0407777			A vs C	3.972	0.0485419	* p<0.05		C	Immature	b
									B vs C	6.0161	0.0053933	** p<0.01
									Treatments	Tukey HSD	Tukey HSD	Tukey HSD
									pair	Q statistic	p-value	inferfence		Treatment letter	Treatment	Graph ANOVA letter
	Ityp-CE20								A vs B	0.0649	0.899995	insignificant		A	Pupa	a
	Treatment letter	Tissue - Whole body	Entry value						A vs C	0.0574	0.899995	insignificant		B	L3	a
	-	Treatment:	1) 2^(-Δct)	2) 2^(-Δct)	3) 2^(-Δct)	4) 2^(-Δct)			A vs D	1.8566	0.567948	insignificant		C	L2	a
	A	Pupa	0.00340595	0.00590029	0.00232811	0.0032048			B vs C	0.0075	0.899995	insignificant		D	L1	a
	B	L3	0.00326275	0.00366002	0.00613964	0.006108			B vs D	1.7917	0.592414	insignificant
	C	L2	0.00364321	0.00906125	0.00190824	0.00405703			C vs D	1.7992	0.589585	insignificant
	D	L1	0.00158188	0.00128182	0.13461	0.00124769
	Treatment letter	Tissue - Female Midgut	Entry value						Treatments	Tukey HSD	Tukey HSD	Tukey HSD
	-	Treatment:	1) 2^(-Δct)	2) 2^(-Δct)	3) 2^(-Δct)	4) 2^(-Δct)			pair	Q statistic	p-value	inferfence		Treatment letter	Treatment	Graph ANOVA letter
	A	Fed	0.00828344	0.03994	0.0186971	0.00648469			A vs B	4.9993	0.0157548	* p<0.05		A	Fed	a
	B	Emerged	0.129475	0.100004	0.0420628	0.205847			A vs C	0.3835	0.899995	insignificant		B	Emerged	b
	C	Immature	0.00738882	0.0122057	0.00704056	0.0157787			B vs C	5.3828	00:15:03.061000	* p<0.05		C	Immature	a
	Treatment letter	Tissue -Female Fatbody	Entry value
	-	Treatment:	A 2^(-Δct)	B 2^(-Δct)	C 2^(-Δct)	D 2^(-Δct)			Treatments	Tukey HSD	Tukey HSD	Tukey HSD		Treatment letter	Treatment	Graph ANOVA letter
	A	Fed	0.00957791	0.0121474	0.00378496	0.00480724			pair	Q statistic	p-value	inferfence		A	Fed	a
	B	Emerged	0.0836615	0.1098	0.058403	0.0497334			A vs B	8.5528	0.0010053	** p<0.01		B	Emerged	b
	C	Immature	0.00663469	0.00170892	0.00655701	0.00357938			A vs C	0.3732	0.899995	insignificant		C	Immature	a
									B vs C	8.926	0.0010053	** p<0.01
	Treatment letter	Tissue - Male Midgut	Entry value
	-	Treatment:	1) 2^(-Δct)	2) 2^(-Δct)	3) 2^(-Δct)	4) 2^(-Δct)			Treatments	Tukey HSD	Tukey HSD	Tukey HSD		Treatment letter	Treatment	Graph ANOVA letter
	A	Fed	0.0703689	0.0287129	0.0251455	0.0399721			pair	Q statistic	p-value	inferfence		A	Fed	a
	B	Emerged	0.00597931	0.0490827	0.00341167	0.00631569			A vs B	2.6988	0.191445	insignificant		B	Emerged	a
	C	Immature	0.0102311	0.0294039	0.00858985	0.0062735			A vs C	2.9782	0.143157	insignificant		C	Immature	a
									B vs C	0.2794	21:35:59.542000	insignificant
	Treatment letter	Tissue - Male Fatbody	Entry value
	-	Treatment:	1) 2^(-Δct)	2) 2^(-Δct)	3) 2^(-Δct)	4) 2^(-Δct)			Treatments	Tukey HSD	Tukey HSD	Tukey HSD		Treatment letter	Treatment	Graph ANOVA letter
	A	Fed	0.00176676	0.00745594	0.00464268	0.0151577			pair	Q statistic	p-value	inferfence		A	Fed	a
	B	Emerged	0.0258815	0.00595501	0.0154451	0.0126531			A vs B	2.6107	0.209407	insignificant		B	Emerged	a
	C	Immature	0.00261125	0.00273	0.00410906	0.00655484			A vs C	1.0994	0.714986	insignificant		C	Immature	a
									B vs C	3.7101	0.064797	insignificant
									Treatments	Tukey HSD	Tukey HSD	Tukey HSD
									pair	Q statistic	p-value	inferfence		Treatment letter	Treatment	Graph ANOVA letter
	Ityp-LIP1								A vs B	4.3465	0.0417365	* p<0.05		A	Pupa	a
	Treatment letter	Tissue - Whole body	Entry value						A vs C	1.8968	0.5527782	insignificant		B	L3	b
	-	Treatment:	1) 2^(-Δct)	2) 2^(-Δct)	3) 2^(-Δct)	4) 2^(-Δct)			A vs D	0.4478	0.8999947	insignificant		C	L2	ab
	A	Pupa	0.000279534	0.000899556	0.000434113	0.000227047			B vs C	2.4496	0.3506222	insignificant		D	L1	ab
	B	L3	2.92618E-05	1.57776E-05	3.8612E-05	7.53044E-05			B vs D	3.8987	0.0719951	insignificant
	C	L2	8.13801E-05	0.000204544	0.000477037	0.000343564			C vs D	1.4490	0.7215635	insignificant
	D	L1	0.000346586	0.000310039	0.000657356	0.000353054
	Treatment letter	Tissue - Female Midgut	Entry value						Treatments	Tukey HSD	Tukey HSD	Tukey HSD
	-	Treatment:	1) 2^(-Δct)	2) 2^(-Δct)	3) 2^(-Δct)	4) 2^(-Δct)			pair	Q statistic	p-value	inferfence		Treatment letter	Treatment	Graph ANOVA letter
	A	Fed	0.0000448553	0.0000116407	0.0001771958	0.0000145372			A vs B	5.7928	0.0085494	** p<0.01		A	Fed	a
	B	Emerged	0.0012596320	0.0023962757	0.0008322223	0.0009349110			A vs C	2.8403	0.1719235	insignificant		B	Emerged	b
	C	Immature	0.000817903	0.000595475	0.000828218				B vs C	2.5228	0.234797	insignificant		C	Immature	ab
	Treatment letter	Tissue -Female Fatbody	Entry value
	-	Treatment:	A 2^(-Δct)	B 2^(-Δct)	C 2^(-Δct)	D 2^(-Δct)			Treatments	Tukey HSD	Tukey HSD	Tukey HSD		Treatment letter	Treatment	Graph ANOVA letter
	A	Fed	0.0000771195	0.0001733209	0.0000770961	0.0001368049			pair	Q statistic	p-value	inferfence		A	Fed	a
	B	Emerged	0.0086974491	0.0131698583	0.0130028701				A vs B	16.7431	0.0010053	** p<0.01		B	Emerged	b
	C	Immature	0.0001132618	0.0002339083	0.0004688313	0.0000771195			A vs C	0.1685	0.8999947	insignificant		C	Immature	a
									B vs C	16.5871	0.0010053	** p<0.01
	Treatment letter	Tissue - Male Midgut	Entry value
	-	Treatment:	1) 2^(-Δct)	2) 2^(-Δct)	3) 2^(-Δct)	4) 2^(-Δct)			Treatments	Tukey HSD	Tukey HSD	Tukey HSD		Treatment letter	Treatment	Graph ANOVA letter
	A	Fed	3.82364E-05	0.000178082	0.001331698	0.000527731			pair	Q statistic	p-value	inferfence		A	Fed	a
	B	Emerged	0.001060683	0.004959033	0.000935366	0.000916748			A vs B	2.4159	0.2541019	insignificant		B	Emerged	a
	C	Immature	9.1444E-05	0.000133669	6.86225E-05	9.39622E-05			A vs C	0.7036	0.8686029	insignificant		C	Immature	a
									B vs C	3.1195	I.00	insignificant
	Treatment letter	Tissue - Male Fatbody	Entry value
	-	Treatment:	1) 2^(-Δct)	2) 2^(-Δct)	3) 2^(-Δct)	4) 2^(-Δct)			Treatments	Tukey HSD	Tukey HSD	Tukey HSD		Treatment letter	Treatment	Graph ANOVA letter
	A	Fed	0.0017257643	0.0028205261	0.0031982919	0.0059863898			pair	Q statistic	p-value	inferfence		A	Fed	a
	B	Emerged	0.0105707539	0.0064328218	0.0089721346	0.0165889970			A vs B	5.0183	0.0154338	* p<0.05		B	Emerged	b
	C	Immature	0.0014741266	0.0026130259	0.0019748369	0.0052630150			A vs C	0.4187	0.8999947	insignificant		C	Immature	a
									B vs C	5.4371	0.0098644	** p<0.01

[truncated: 5 more sheets: A, B, C, D, T-test]
