# Supplementary material for: Screening of Ester-Forming and Hydrolyzing Enzymes Linked to Pheromone Production in Ips typographus (Linnaeus, 1758)
Source: Research Square preprint supplement (doi:10.21203/rs.3.rs-7583299/v1), 2025-10-03
Supplement: Supplementary file 4 [file d4d0be308d40d6f4d670544f.xlsx]

## Sheet: List1
	Supplementary Table S1.
	Primer sequences used for quantitative real-time PCR (qRT-PCR).
	Designed Primer Sequences
	Integrated DNA Technologies PrimerQuest™ Tool
	Gene Name	Type	Sequence
	Ityp-CE15	Forward Primer	CTTCGTGGAGTTGAAGTGG
		Reverse Primer	CCTCTACATCGGGCTCTAA
	Ityp-CE21	Forward Primer	GGACTGCCTCTACCTCAA
		Reverse Primer	CCGTACCAATGGGTGTTC
	Ityp-CE10	Forward Primer	CTGCAGAGTTTGGATGCT
		Reverse Primer	AGTGTGTACTGCCTCTCA
	Ityp-CE9	Forward Primer	GTGGTCCTGATTGGTTCATC
		Reverse Primer	GGGCTAGTTGTTGGTCTTTC
	Ityp-CE13	Forward Primer	GCAACTGACCGCTACAAA
		Reverse Primer	CAAGATACACCGCCCATC
	Ityp-CE16	Forward Primer	GGAGAGTTGAGATTTGCGTCT
		Reverse Primer	GCCAGATTTGAAGCTCCCTC
	Ityp-CE20	Forward Primer	GGTCTACGGTGGTTGAGA
		Reverse Primer	GTGGTACACCACCCATTAAC
	Ityp-LIP1	Forward Primer	GTGCAGGGAGGGAAAATTGG
		Reverse Primer	GAAGTCGACATATCCGCACG
	Ityp04817 (RPL6)	Forward Primer	CCACCAGCGAACATTGAG
		Reverse Primer	TTCCGTAGGGACCTGTAAC
